# Supplementary material for: Effect of exogenous gonadotropin on the transcriptome of human granulosa cells and follicular fluid hormone profiles
Source: Springer Nature journal article supplement (doi:10.1186/s12958-019-0489-4), 2019-06-24

A

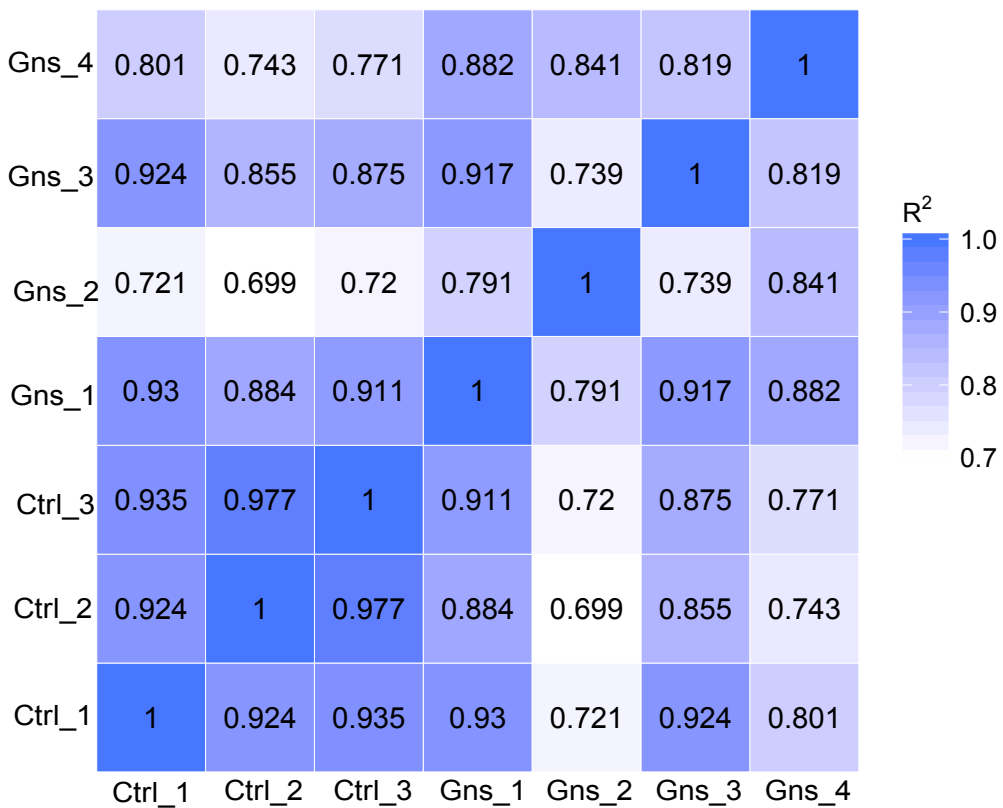

B

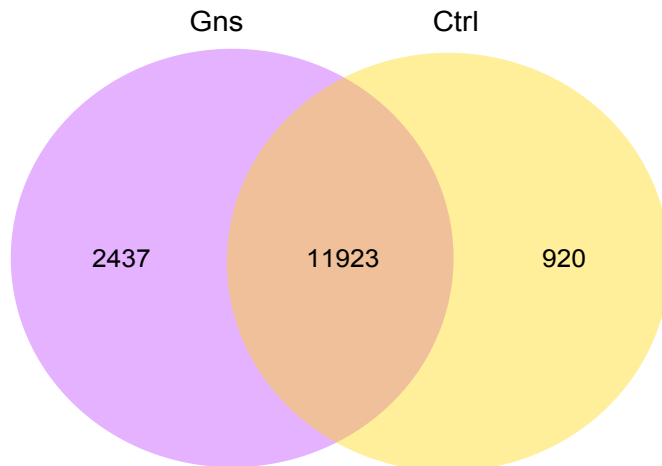

Supplement: MOESM1 [file 16847866]
