# Supplementary material for: Effect of exogenous gonadotropin on the transcriptome of human granulosa cells and follicular fluid hormone profiles
Source: Reprod Biol Endocrinol. 2019 Jun 24;17:49. doi: 10.1186/s12958-019-0489-4 (PMC6591892; doi:10.1186/s12958-019-0489-4)
Supplement: Supplementary file 7 — Table S6. Pathway enrichment of genes down-regulated in the Gns group compared with the Control group. (XLSX 26 kb) [file 12958_2019_489_MOESM7_ESM.xlsx]

## Sheet: GnsvsCtrl_down.DEG_KEGG_pathway
Table S6. Pathway enrichment of genes down-regulated in the Gns group compared with the Control group.
##Databases: KEGG PATHWAY
##Statistical test method: hypergeometric test / Fisher's exact test
##FDR correction method: Benjamini and Hochberg
#Term	Database	ID	Input number	Background number	P-Value	Corrected P-Value	Input	KEGG_ID/KO	Entrez_ID	Hyperlink
Cell cycle	KEGG PATHWAY	hsa04110	14	124	8.3057e-10	1.09635e-07	ENSG00000127564|ENSG00000166851|ENSG00000164045|ENSG00000112742|ENSG00000117399|ENSG00000158402|ENSG00000145386|ENSG00000157456|ENSG00000156970|ENSG00000093009|ENSG00000134057|ENSG00000094804|ENSG00000091651|ENSG00000135476	hsa:9088|hsa:5347|hsa:993|hsa:7272|hsa:991|hsa:995|hsa:890|hsa:9133|hsa:701|hsa:8318|hsa:891|hsa:990|hsa:23594|hsa:9700|	9088|5347|993|7272|991|995|890|9133|701|8318|891|990|23594|9700|	http://www.genome.jp/kegg-bin/show_pathway?hsa04110/hsa:993%09red/hsa:991%09red/hsa:990%09red/hsa:995%09red/hsa:8318%09red/hsa:890%09red/hsa:701%09red/hsa:5347%09red/hsa:9700%09red/hsa:891%09red/hsa:7272%09red/hsa:9133%09red/hsa:23594%09red/hsa:9088%09red
Oocyte meiosis	KEGG PATHWAY	hsa04114	8	110	7.15496e-05	0.00347694	ENSG00000127564|ENSG00000166851|ENSG00000117399|ENSG00000158402|ENSG00000157456|ENSG00000087586|ENSG00000134057|ENSG00000135476	hsa:9088|hsa:5347|hsa:991|hsa:995|hsa:9133|hsa:6790|hsa:891|hsa:9700|	9088|5347|991|995|9133|6790|891|9700|	http://www.genome.jp/kegg-bin/show_pathway?hsa04114/hsa:991%09red/hsa:9088%09red/hsa:995%09red/hsa:891%09red/hsa:5347%09red/hsa:9700%09red/hsa:6790%09red/hsa:9133%09red
Steroid hormone biosynthesis	KEGG PATHWAY	hsa00140	6	57	8.9559e-05	0.00347694	ENSG00000137869|ENSG00000176387|ENSG00000148795|ENSG00000231852|ENSG00000204338|ENSG00000108785	hsa:1588|hsa:3291|hsa:1586|hsa:1589|hsa:1589|hsa:3292|	1588|3291|1586|1589|1589|3292|	http://www.genome.jp/kegg-bin/show_pathway?hsa00140/hsa:3292%09red/hsa:1589%09red/hsa:3291%09red/hsa:1586%09red/hsa:1588%09red
Progesterone-mediated oocyte maturation	KEGG PATHWAY	hsa04914	7	86	0.000105362	0.00347694	ENSG00000127564|ENSG00000166851|ENSG00000164045|ENSG00000157456|ENSG00000158402|ENSG00000145386|ENSG00000134057	hsa:9088|hsa:5347|hsa:993|hsa:9133|hsa:995|hsa:890|hsa:891|	9088|5347|993|9133|995|890|891|	http://www.genome.jp/kegg-bin/show_pathway?hsa04914/hsa:993%09red/hsa:890%09red/hsa:995%09red/hsa:891%09red/hsa:5347%09red/hsa:9133%09red/hsa:9088%09red
Ovarian steroidogenesis	KEGG PATHWAY	hsa04913	5	51	0.000474907	0.0125375	ENSG00000170820|ENSG00000137869|ENSG00000148795|ENSG00000138039|ENSG00000108785	hsa:2492|hsa:1588|hsa:1586|hsa:3973|hsa:3292|	2492|1588|1586|3973|3292|	http://www.genome.jp/kegg-bin/show_pathway?hsa04913/hsa:3292%09red/hsa:2492%09red/hsa:3973%09red/hsa:1586%09red/hsa:1588%09red
Glutathione metabolism	KEGG PATHWAY	hsa00480	4	49	0.00330759	0.072767	ENSG00000244067|ENSG00000243955|ENSG00000171848|ENSG00000001084	hsa:2939|hsa:2938|hsa:6241|hsa:2729|	2939|2938|6241|2729|	http://www.genome.jp/kegg-bin/show_pathway?hsa00480/hsa:2729%09red/hsa:2938%09red/hsa:2939%09red/hsa:6241%09red
p53 signaling pathway	KEGG PATHWAY	hsa04115	4	68	0.00979778	0.184758	ENSG00000157456|ENSG00000171848|ENSG00000134057|ENSG00000075218	hsa:9133|hsa:6241|hsa:891|hsa:51512|	9133|6241|891|51512|	http://www.genome.jp/kegg-bin/show_pathway?hsa04115/hsa:51512%09red/hsa:891%09red/hsa:9133%09red/hsa:6241%09red
Terpenoid backbone biosynthesis	KEGG PATHWAY	hsa00900	2	21	0.0288349	0.43632	ENSG00000134240|ENSG00000113161	hsa:3158|hsa:3156|	3158|3156|	http://www.genome.jp/kegg-bin/show_pathway?hsa00900/hsa:3156%09red/hsa:3158%09red
Glycerolipid metabolism	KEGG PATHWAY	hsa00561	3	55	0.0297491	0.43632	ENSG00000198074|ENSG00000136267|ENSG00000175445	hsa:57016|hsa:1607|hsa:4023|	57016|1607|4023|	http://www.genome.jp/kegg-bin/show_pathway?hsa00561/hsa:57016%09red/hsa:4023%09red/hsa:1607%09red
PPAR signaling pathway	KEGG PATHWAY	hsa03320	3	69	0.0511748	0.61417	ENSG00000134240|ENSG00000175445|ENSG00000110245	hsa:3158|hsa:4023|hsa:345|	3158|4023|345|	http://www.genome.jp/kegg-bin/show_pathway?hsa03320/hsa:4023%09red/hsa:345%09red/hsa:3158%09red
Metabolic pathways	KEGG PATHWAY	hsa01100	21	1213	0.0511809	0.61417	ENSG00000198074|ENSG00000136267|ENSG00000237406|ENSG00000131471|ENSG00000101638|ENSG00000241218|ENSG00000003137|ENSG00000110328|ENSG00000177181|ENSG00000137869|ENSG00000001084|ENSG00000239959|ENSG00000148795|ENSG00000231852|ENSG00000186197|ENSG00000113161|ENSG00000226562|ENSG00000134240|ENSG00000171848|ENSG00000204338|ENSG00000108785	hsa:57016|hsa:1607|hsa:4704|hsa:8639|hsa:29906|hsa:1431|hsa:56603|hsa:374378|hsa:284716|hsa:1588|hsa:2729|hsa:339221|hsa:1586|hsa:1589|hsa:2026|hsa:3156|hsa:4051|hsa:3158|hsa:6241|hsa:1589|hsa:3292|	57016|1607|4704|8639|29906|1431|56603|374378|284716|1588|2729|339221|1586|1589|2026|3156|4051|3158|6241|1589|3292|	http://www.genome.jp/kegg-bin/show_pathway?hsa01100/hsa:2729%09red/hsa:1431%09red/hsa:339221%09red/hsa:3158%09red/hsa:56603%09red/hsa:374378%09red/hsa:3156%09red/hsa:1607%09red/hsa:4704%09red/hsa:1588%09red/hsa:1589%09red/hsa:29906%09red/hsa:4051%09red/hsa:6241%09red/hsa:3292%09red/hsa:2026%09red/hsa:57016%09red/hsa:284716%09red/hsa:8639%09red/hsa:1586%09red
Prolactin signaling pathway	KEGG PATHWAY	hsa04917	3	72	0.0565193	0.621713	ENSG00000148795|ENSG00000091831|ENSG00000138039	hsa:1586|hsa:2099|hsa:3973|	1586|2099|3973|	http://www.genome.jp/kegg-bin/show_pathway?hsa04917/hsa:3973%09red/hsa:1586%09red/hsa:2099%09red
Axon guidance	KEGG PATHWAY	hsa04360	4	127	0.0662768	0.645454	ENSG00000090776|ENSG00000077264|ENSG00000044524|ENSG00000185008	hsa:1947|hsa:5063|hsa:2042|hsa:6092|	1947|5063|2042|6092|	http://www.genome.jp/kegg-bin/show_pathway?hsa04360/hsa:6092%09red/hsa:2042%09red/hsa:5063%09red/hsa:1947%09red
Platelet activation	KEGG PATHWAY	hsa04611	4	131	0.0722931	0.645454	ENSG00000060718|ENSG00000140795|ENSG00000171914|ENSG00000152402	hsa:1301|hsa:91807|hsa:83660|hsa:2977|	1301|91807|83660|2977|	http://www.genome.jp/kegg-bin/show_pathway?hsa04611/hsa:83660%09red/hsa:2977%09red/hsa:91807%09red/hsa:1301%09red
FoxO signaling pathway	KEGG PATHWAY	hsa04068	4	134	0.0769819	0.645454	ENSG00000157456|ENSG00000166851|ENSG00000184481|ENSG00000134057	hsa:9133|hsa:5347|hsa:4303|hsa:891|	9133|5347|4303|891|	http://www.genome.jp/kegg-bin/show_pathway?hsa04068/hsa:5347%09red/hsa:9133%09red/hsa:4303%09red/hsa:891%09red
Hypertrophic cardiomyopathy (HCM)	KEGG PATHWAY	hsa05410	3	83	0.0782369	0.645454	ENSG00000182389|ENSG00000129991|ENSG00000134571	hsa:785|hsa:7137|hsa:4607|	785|7137|4607|	http://www.genome.jp/kegg-bin/show_pathway?hsa05410/hsa:7137%09red/hsa:785%09red/hsa:4607%09red
ECM-receptor interaction	KEGG PATHWAY	hsa04512	3	87	0.0869135	0.674858	ENSG00000060718|ENSG00000072571|ENSG00000142798	hsa:1301|hsa:3161|hsa:3339|	1301|3161|3339|	http://www.genome.jp/kegg-bin/show_pathway?hsa04512/hsa:3339%09red/hsa:3161%09red/hsa:1301%09red
Dilated cardiomyopathy	KEGG PATHWAY	hsa05414	3	90	0.093676	0.686957	ENSG00000182389|ENSG00000129991|ENSG00000134571	hsa:785|hsa:7137|hsa:4607|	785|7137|4607|	http://www.genome.jp/kegg-bin/show_pathway?hsa05414/hsa:7137%09red/hsa:785%09red/hsa:4607%09red
Neuroactive ligand-receptor interaction	KEGG PATHWAY	hsa04080	6	275	0.109459	0.726155	ENSG00000152208|ENSG00000213694|ENSG00000170820|ENSG00000151617|ENSG00000138039|ENSG00000050628	hsa:2895|hsa:1903|hsa:2492|hsa:1910|hsa:3973|hsa:5733|	2895|1903|2492|1910|3973|5733|	http://www.genome.jp/kegg-bin/show_pathway?hsa04080/hsa:2895%09red/hsa:3973%09red/hsa:1910%09red/hsa:2492%09red/hsa:5733%09red/hsa:1903%09red
Synthesis and degradation of ketone bodies	KEGG PATHWAY	hsa00072	1	9	0.110023	0.726155	ENSG00000134240	hsa:3158|	3158|	http://www.genome.jp/kegg-bin/show_pathway?hsa00072/hsa:3158%09red
cGMP-PKG signaling pathway	KEGG PATHWAY	hsa04022	4	167	0.137788	0.780841	ENSG00000140795|ENSG00000152402|ENSG00000151617|ENSG00000254840	hsa:91807|hsa:2977|hsa:1910|hsa:2969|	91807|2977|1910|2969|	http://www.genome.jp/kegg-bin/show_pathway?hsa04022/hsa:2969%09red/hsa:1910%09red/hsa:91807%09red/hsa:2977%09red
Long-term depression	KEGG PATHWAY	hsa04730	2	60	0.161492	0.780841	ENSG00000152208|ENSG00000152402	hsa:2895|hsa:2977|	2895|2977|	http://www.genome.jp/kegg-bin/show_pathway?hsa04730/hsa:2895%09red/hsa:2977%09red
Calcium signaling pathway	KEGG PATHWAY	hsa04020	4	180	0.165801	0.780841	ENSG00000140795|ENSG00000151617|ENSG00000138039|ENSG00000050628	hsa:91807|hsa:1910|hsa:3973|hsa:5733|	91807|1910|3973|5733|	http://www.genome.jp/kegg-bin/show_pathway?hsa04020/hsa:5733%09red/hsa:91807%09red/hsa:3973%09red/hsa:1910%09red
Glycosphingolipid biosynthesis - ganglio series	KEGG PATHWAY	hsa00604	1	15	0.170158	0.780841	ENSG00000101638	hsa:29906|	29906|	http://www.genome.jp/kegg-bin/show_pathway?hsa00604/hsa:29906%09red
AMPK signaling pathway	KEGG PATHWAY	hsa04152	3	124	0.182895	0.780841	ENSG00000001626|ENSG00000145386|ENSG00000113161	hsa:1080|hsa:890|hsa:3156|	1080|890|3156|	http://www.genome.jp/kegg-bin/show_pathway?hsa04152/hsa:3156%09red/hsa:1080%09red/hsa:890%09red
2-Oxocarboxylic acid metabolism	KEGG PATHWAY	hsa01210	1	17	0.189289	0.780841	ENSG00000241218	hsa:1431|	1431|	http://www.genome.jp/kegg-bin/show_pathway?hsa01210/hsa:1431%09red
Drug metabolism - cytochrome P450	KEGG PATHWAY	hsa00982	2	68	0.194671	0.780841	ENSG00000244067|ENSG00000243955	hsa:2939|hsa:2938|	2939|2938|	http://www.genome.jp/kegg-bin/show_pathway?hsa00982/hsa:2938%09red/hsa:2939%09red
HTLV-I infection	KEGG PATHWAY	hsa05166	5	261	0.196869	0.780841	ENSG00000117399|ENSG00000157456|ENSG00000156970|ENSG00000171914|ENSG00000101057	hsa:991|hsa:9133|hsa:701|hsa:83660|hsa:4605|	991|9133|701|83660|4605|	http://www.genome.jp/kegg-bin/show_pathway?hsa05166/hsa:83660%09red/hsa:991%09red/hsa:4605%09red/hsa:9133%09red/hsa:701%09red
Phenylalanine metabolism	KEGG PATHWAY	hsa00360	1	18	0.198689	0.780841	ENSG00000131471	hsa:8639|	8639|	http://www.genome.jp/kegg-bin/show_pathway?hsa00360/hsa:8639%09red
Bile secretion	KEGG PATHWAY	hsa04976	2	72	0.21157	0.780841	ENSG00000001626|ENSG00000113161	hsa:1080|hsa:3156|	1080|3156|	http://www.genome.jp/kegg-bin/show_pathway?hsa04976/hsa:3156%09red/hsa:1080%09red
cAMP signaling pathway	KEGG PATHWAY	hsa04024	4	200	0.212357	0.780841	ENSG00000170820|ENSG00000001626|ENSG00000129991|ENSG00000050628	hsa:2492|hsa:1080|hsa:7137|hsa:5733|	2492|1080|7137|5733|	http://www.genome.jp/kegg-bin/show_pathway?hsa04024/hsa:5733%09red/hsa:2492%09red/hsa:7137%09red/hsa:1080%09red
Ribosome	KEGG PATHWAY	hsa03010	3	134	0.21243	0.780841	ENSG00000241634|ENSG00000237226|ENSG00000237425	hsa:6137|hsa:6189|hsa:3921|	6137|6189|3921|	http://www.genome.jp/kegg-bin/show_pathway?hsa03010/hsa:6189%09red/hsa:3921%09red/hsa:6137%09red
Biosynthesis of amino acids	KEGG PATHWAY	hsa01230	2	74	0.220074	0.780841	ENSG00000241218|ENSG00000186197	hsa:1431|hsa:2026|	1431|2026|	http://www.genome.jp/kegg-bin/show_pathway?hsa01230/hsa:1431%09red/hsa:2026%09red
Metabolism of xenobiotics by cytochrome P450	KEGG PATHWAY	hsa00980	2	74	0.220074	0.780841	ENSG00000244067|ENSG00000243955	hsa:2939|hsa:2938|	2939|2938|	http://www.genome.jp/kegg-bin/show_pathway?hsa00980/hsa:2938%09red/hsa:2939%09red
Proteoglycans in cancer	KEGG PATHWAY	hsa05205	4	204	0.222082	0.780841	ENSG00000167244|ENSG00000100234|ENSG00000142798|ENSG00000091831	hsa:3481|hsa:7078|hsa:3339|hsa:2099|	3481|7078|3339|2099|	http://www.genome.jp/kegg-bin/show_pathway?hsa05205/hsa:3481%09red/hsa:3339%09red/hsa:7078%09red/hsa:2099%09red
Gastric acid secretion	KEGG PATHWAY	hsa04971	2	75	0.224337	0.780841	ENSG00000001626|ENSG00000140795	hsa:1080|hsa:91807|	1080|91807|	http://www.genome.jp/kegg-bin/show_pathway?hsa04971/hsa:91807%09red/hsa:1080%09red
Focal adhesion	KEGG PATHWAY	hsa04510	4	207	0.229452	0.780841	ENSG00000060718|ENSG00000140795|ENSG00000171914|ENSG00000077264	hsa:1301|hsa:91807|hsa:83660|hsa:5063|	1301|91807|83660|5063|	http://www.genome.jp/kegg-bin/show_pathway?hsa04510/hsa:83660%09red/hsa:5063%09red/hsa:91807%09red/hsa:1301%09red
Cardiac muscle contraction	KEGG PATHWAY	hsa04260	2	78	0.237159	0.780841	ENSG00000182389|ENSG00000129991	hsa:785|hsa:7137|	785|7137|	http://www.genome.jp/kegg-bin/show_pathway?hsa04260/hsa:7137%09red/hsa:785%09red
Mismatch repair	KEGG PATHWAY	hsa03430	1	23	0.244084	0.780841	ENSG00000174371	hsa:9156|	9156|	http://www.genome.jp/kegg-bin/show_pathway?hsa03430/hsa:9156%09red
Chemical carcinogenesis	KEGG PATHWAY	hsa05204	2	80	0.24573	0.780841	ENSG00000244067|ENSG00000243955	hsa:2939|hsa:2938|	2939|2938|	http://www.genome.jp/kegg-bin/show_pathway?hsa05204/hsa:2938%09red/hsa:2939%09red
Hepatitis B	KEGG PATHWAY	hsa05161	3	146	0.249083	0.780841	ENSG00000142798|ENSG00000089685|ENSG00000145386	hsa:3339|hsa:332|hsa:890|	3339|332|890|	http://www.genome.jp/kegg-bin/show_pathway?hsa05161/hsa:332%09red/hsa:3339%09red/hsa:890%09red
Glyoxylate and dicarboxylate metabolism	KEGG PATHWAY	hsa00630	1	25	0.261517	0.780841	ENSG00000241218	hsa:1431|	1431|	http://www.genome.jp/kegg-bin/show_pathway?hsa00630/hsa:1431%09red
Butanoate metabolism	KEGG PATHWAY	hsa00650	1	26	0.270082	0.780841	ENSG00000134240	hsa:3158|	3158|	http://www.genome.jp/kegg-bin/show_pathway?hsa00650/hsa:3158%09red
Protein digestion and absorption	KEGG PATHWAY	hsa04974	2	89	0.284366	0.780841	ENSG00000060718|ENSG00000219073	hsa:1301|hsa:23436|	1301|23436|	http://www.genome.jp/kegg-bin/show_pathway?hsa04974/hsa:23436%09red/hsa:1301%09red
Gap junction	KEGG PATHWAY	hsa04540	2	89	0.284366	0.780841	ENSG00000152402|ENSG00000104833	hsa:2977|hsa:10382|	2977|10382|	http://www.genome.jp/kegg-bin/show_pathway?hsa04540/hsa:2977%09red/hsa:10382%09red
Homologous recombination	KEGG PATHWAY	hsa03440	1	28	0.286917	0.780841	ENSG00000085999	hsa:8438|	8438|	http://www.genome.jp/kegg-bin/show_pathway?hsa03440/hsa:8438%09red
Oxytocin signaling pathway	KEGG PATHWAY	hsa04921	3	159	0.289744	0.780841	ENSG00000182389|ENSG00000152402|ENSG00000140795	hsa:785|hsa:2977|hsa:91807|	785|2977|91807|	http://www.genome.jp/kegg-bin/show_pathway?hsa04921/hsa:91807%09red/hsa:785%09red/hsa:2977%09red
Citrate cycle (TCA cycle)	KEGG PATHWAY	hsa00020	1	30	0.303365	0.780841	ENSG00000241218	hsa:1431|	1431|	http://www.genome.jp/kegg-bin/show_pathway?hsa00020/hsa:1431%09red
beta-Alanine metabolism	KEGG PATHWAY	hsa00410	1	30	0.303365	0.780841	ENSG00000131471	hsa:8639|	8639|	http://www.genome.jp/kegg-bin/show_pathway?hsa00410/hsa:8639%09red
Mucin type O-Glycan biosynthesis	KEGG PATHWAY	hsa00512	1	31	0.311447	0.780841	ENSG00000110328	hsa:374378|	374378|	http://www.genome.jp/kegg-bin/show_pathway?hsa00512/hsa:374378%09red
Galactose metabolism	KEGG PATHWAY	hsa00052	1	31	0.311447	0.780841	ENSG00000198074	hsa:57016|	57016|	http://www.genome.jp/kegg-bin/show_pathway?hsa00052/hsa:57016%09red
Pancreatic secretion	KEGG PATHWAY	hsa04972	2	96	0.314304	0.780841	ENSG00000219073|ENSG00000001626	hsa:23436|hsa:1080|	23436|1080|	http://www.genome.jp/kegg-bin/show_pathway?hsa04972/hsa:1080%09red/hsa:23436%09red
Circadian entrainment	KEGG PATHWAY	hsa04713	2	97	0.318561	0.780841	ENSG00000152402|ENSG00000111665	hsa:2977|hsa:2784|	2977|2784|	http://www.genome.jp/kegg-bin/show_pathway?hsa04713/hsa:2977%09red/hsa:2784%09red
Fructose and mannose metabolism	KEGG PATHWAY	hsa00051	1	32	0.319435	0.780841	ENSG00000198074	hsa:57016|	57016|	http://www.genome.jp/kegg-bin/show_pathway?hsa00051/hsa:57016%09red
Tyrosine metabolism	KEGG PATHWAY	hsa00350	1	35	0.34285	0.808146	ENSG00000131471	hsa:8639|	8639|	http://www.genome.jp/kegg-bin/show_pathway?hsa00350/hsa:8639%09red
Alanine, aspartate and glutamate metabolism	KEGG PATHWAY	hsa00250	1	35	0.34285	0.808146	ENSG00000177181	hsa:284716|	284716|	http://www.genome.jp/kegg-bin/show_pathway?hsa00250/hsa:284716%09red
Pentose and glucuronate interconversions	KEGG PATHWAY	hsa00040	1	36	0.350475	0.811454	ENSG00000198074	hsa:57016|	57016|	http://www.genome.jp/kegg-bin/show_pathway?hsa00040/hsa:57016%09red
Carbon metabolism	KEGG PATHWAY	hsa01200	2	106	0.356548	0.811454	ENSG00000241218|ENSG00000186197	hsa:1431|hsa:2026|	1431|2026|	http://www.genome.jp/kegg-bin/show_pathway?hsa01200/hsa:1431%09red/hsa:2026%09red
Aldosterone-regulated sodium reabsorption	KEGG PATHWAY	hsa04960	1	39	0.372826	0.823034	ENSG00000176387	hsa:3291|	3291|	http://www.genome.jp/kegg-bin/show_pathway?hsa04960/hsa:3291%09red
Glycine, serine and threonine metabolism	KEGG PATHWAY	hsa00260	1	40	0.380104	0.823034	ENSG00000131471	hsa:8639|	8639|	http://www.genome.jp/kegg-bin/show_pathway?hsa00260/hsa:8639%09red
Serotonergic synapse	KEGG PATHWAY	hsa04726	2	114	0.389666	0.823034	ENSG00000165646|ENSG00000111665	hsa:6571|hsa:2784|	6571|2784|	http://www.genome.jp/kegg-bin/show_pathway?hsa04726/hsa:6571%09red/hsa:2784%09red
Glutamatergic synapse	KEGG PATHWAY	hsa04724	2	116	0.39783	0.823034	ENSG00000111665|ENSG00000161681	hsa:2784|hsa:50944|	2784|50944|	http://www.genome.jp/kegg-bin/show_pathway?hsa04724/hsa:50944%09red/hsa:2784%09red
ABC transporters	KEGG PATHWAY	hsa02010	1	44	0.408387	0.823034	ENSG00000001626	hsa:1080|	1080|	http://www.genome.jp/kegg-bin/show_pathway?hsa02010/hsa:1080%09red
Valine, leucine and isoleucine degradation	KEGG PATHWAY	hsa00280	1	44	0.408387	0.823034	ENSG00000134240	hsa:3158|	3158|	http://www.genome.jp/kegg-bin/show_pathway?hsa00280/hsa:3158%09red
Basal transcription factors	KEGG PATHWAY	hsa03022	1	45	0.415254	0.823034	ENSG00000254840	hsa:2969|	2969|	http://www.genome.jp/kegg-bin/show_pathway?hsa03022/hsa:2969%09red
Vascular smooth muscle contraction	KEGG PATHWAY	hsa04270	2	121	0.418013	0.823034	ENSG00000140795|ENSG00000152402	hsa:91807|hsa:2977|	91807|2977|	http://www.genome.jp/kegg-bin/show_pathway?hsa04270/hsa:91807%09red/hsa:2977%09red
Sphingolipid metabolism	KEGG PATHWAY	hsa00600	1	47	0.428751	0.823034	ENSG00000239959	hsa:339221|	339221|	http://www.genome.jp/kegg-bin/show_pathway?hsa00600/hsa:339221%09red
Endocrine and other factor-regulated calcium reabsorption	KEGG PATHWAY	hsa04961	1	48	0.435383	0.823034	ENSG00000091831	hsa:2099|	2099|	http://www.genome.jp/kegg-bin/show_pathway?hsa04961/hsa:2099%09red
Cocaine addiction	KEGG PATHWAY	hsa05030	1	50	0.448417	0.823034	ENSG00000165646	hsa:6571|	6571|	http://www.genome.jp/kegg-bin/show_pathway?hsa05030/hsa:6571%09red
Dopaminergic synapse	KEGG PATHWAY	hsa04728	2	131	0.457314	0.823034	ENSG00000165646|ENSG00000111665	hsa:6571|hsa:2784|	6571|2784|	http://www.genome.jp/kegg-bin/show_pathway?hsa04728/hsa:6571%09red/hsa:2784%09red
Hedgehog signaling pathway	KEGG PATHWAY	hsa04340	1	52	0.461151	0.823034	ENSG00000163501	hsa:3549|	3549|	http://www.genome.jp/kegg-bin/show_pathway?hsa04340/hsa:3549%09red
MicroRNAs in cancer	KEGG PATHWAY	hsa05206	4	297	0.461915	0.823034	ENSG00000100234|ENSG00000146670|ENSG00000158402|ENSG00000164045	hsa:7078|hsa:113130|hsa:995|hsa:993|	7078|113130|995|993|	http://www.genome.jp/kegg-bin/show_pathway?hsa05206/hsa:993%09red/hsa:7078%09red/hsa:995%09red/hsa:113130%09red
Regulation of actin cytoskeleton	KEGG PATHWAY	hsa04810	3	215	0.464163	0.823034	ENSG00000183856|ENSG00000077264|ENSG00000140795	hsa:128239|hsa:5063|hsa:91807|	128239|5063|91807|	http://www.genome.jp/kegg-bin/show_pathway?hsa04810/hsa:91807%09red/hsa:5063%09red/hsa:128239%09red
Taste transduction	KEGG PATHWAY	hsa04742	1	53	0.467408	0.823034	ENSG00000111665	hsa:2784|	2784|	http://www.genome.jp/kegg-bin/show_pathway?hsa04742/hsa:2784%09red
Vibrio cholerae infection	KEGG PATHWAY	hsa05110	1	54	0.473593	0.823034	ENSG00000001626	hsa:1080|	1080|	http://www.genome.jp/kegg-bin/show_pathway?hsa05110/hsa:1080%09red
Pathogenic Escherichia coli infection	KEGG PATHWAY	hsa05130	1	55	0.479706	0.823034	ENSG00000104833	hsa:10382|	10382|	http://www.genome.jp/kegg-bin/show_pathway?hsa05130/hsa:10382%09red
Ubiquitin mediated proteolysis	KEGG PATHWAY	hsa04120	2	137	0.48015	0.823034	ENSG00000175063|ENSG00000117399	hsa:7320|hsa:991|	7320|991|	http://www.genome.jp/kegg-bin/show_pathway?hsa04120/hsa:991%09red/hsa:7320%09red
Ras signaling pathway	KEGG PATHWAY	hsa04014	3	228	0.50234	0.823034	ENSG00000184481|ENSG00000077264|ENSG00000111665	hsa:4303|hsa:5063|hsa:2784|	4303|5063|2784|	http://www.genome.jp/kegg-bin/show_pathway?hsa04014/hsa:5063%09red/hsa:4303%09red/hsa:2784%09red
Parkinson's disease	KEGG PATHWAY	hsa05012	2	143	0.50239	0.823034	ENSG00000165646|ENSG00000237406	hsa:6571|hsa:4704|	6571|4704|	http://www.genome.jp/kegg-bin/show_pathway?hsa05012/hsa:6571%09red/hsa:4704%09red
Colorectal cancer	KEGG PATHWAY	hsa05210	1	62	0.52056	0.823034	ENSG00000089685	hsa:332|	332|	http://www.genome.jp/kegg-bin/show_pathway?hsa05210/hsa:332%09red
Arachidonic acid metabolism	KEGG PATHWAY	hsa00590	1	62	0.52056	0.823034	ENSG00000226562	hsa:4051|	4051|	http://www.genome.jp/kegg-bin/show_pathway?hsa00590/hsa:4051%09red
Adrenergic signaling in cardiomyocytes	KEGG PATHWAY	hsa04261	2	149	0.524008	0.823034	ENSG00000182389|ENSG00000129991	hsa:785|hsa:7137|	785|7137|	http://www.genome.jp/kegg-bin/show_pathway?hsa04261/hsa:7137%09red/hsa:785%09red
Synaptic vesicle cycle	KEGG PATHWAY	hsa04721	1	63	0.52613	0.823034	ENSG00000165646	hsa:6571|	6571|	http://www.genome.jp/kegg-bin/show_pathway?hsa04721/hsa:6571%09red
Retinol metabolism	KEGG PATHWAY	hsa00830	1	64	0.531635	0.823034	ENSG00000003137	hsa:56603|	56603|	http://www.genome.jp/kegg-bin/show_pathway?hsa00830/hsa:56603%09red
Hippo signaling pathway	KEGG PATHWAY	hsa04390	2	154	0.541537	0.823034	ENSG00000187079|ENSG00000089685	hsa:7003|hsa:332|	7003|332|	http://www.genome.jp/kegg-bin/show_pathway?hsa04390/hsa:7003%09red/hsa:332%09red
Glycolysis / Gluconeogenesis	KEGG PATHWAY	hsa00010	1	66	0.542454	0.823034	ENSG00000186197	hsa:2026|	2026|	http://www.genome.jp/kegg-bin/show_pathway?hsa00010/hsa:2026%09red
Renal cell carcinoma	KEGG PATHWAY	hsa05211	1	66	0.542454	0.823034	ENSG00000077264	hsa:5063|	5063|	http://www.genome.jp/kegg-bin/show_pathway?hsa05211/hsa:5063%09red
Amphetamine addiction	KEGG PATHWAY	hsa05031	1	68	0.553024	0.829536	ENSG00000165646	hsa:6571|	6571|	http://www.genome.jp/kegg-bin/show_pathway?hsa05031/hsa:6571%09red
Adherens junction	KEGG PATHWAY	hsa04520	1	73	0.578397	0.843942	ENSG00000243323	hsa:5787|	5787|	http://www.genome.jp/kegg-bin/show_pathway?hsa04520/hsa:5787%09red
RNA degradation	KEGG PATHWAY	hsa03018	1	74	0.583297	0.843942	ENSG00000186197	hsa:2026|	2026|	http://www.genome.jp/kegg-bin/show_pathway?hsa03018/hsa:2026%09red
Arrhythmogenic right ventricular cardiomyopathy (ARVC)	KEGG PATHWAY	hsa05412	1	74	0.583297	0.843942	ENSG00000182389	hsa:785|	785|	http://www.genome.jp/kegg-bin/show_pathway?hsa05412/hsa:785%09red
Alzheimer's disease	KEGG PATHWAY	hsa05010	2	168	0.588202	0.843942	ENSG00000175445|ENSG00000237406	hsa:4023|hsa:4704|	4023|4704|	http://www.genome.jp/kegg-bin/show_pathway?hsa05010/hsa:4023%09red/hsa:4704%09red
TGF-beta signaling pathway	KEGG PATHWAY	hsa04350	1	80	0.611527	0.853927	ENSG00000122641	hsa:3624|	3624|	http://www.genome.jp/kegg-bin/show_pathway?hsa04350/hsa:3624%09red
Purine metabolism	KEGG PATHWAY	hsa00230	2	176	0.613249	0.853927	ENSG00000171848|ENSG00000152402	hsa:6241|hsa:2977|	6241|2977|	http://www.genome.jp/kegg-bin/show_pathway?hsa00230/hsa:6241%09red/hsa:2977%09red
Phosphatidylinositol signaling system	KEGG PATHWAY	hsa04070	1	81	0.616043	0.853927	ENSG00000136267	hsa:1607|	1607|	http://www.genome.jp/kegg-bin/show_pathway?hsa04070/hsa:1607%09red
Alcoholism	KEGG PATHWAY	hsa05034	2	180	0.625331	0.853927	ENSG00000165646|ENSG00000111665	hsa:6571|hsa:2784|	6571|2784|	http://www.genome.jp/kegg-bin/show_pathway?hsa05034/hsa:6571%09red/hsa:2784%09red
ErbB signaling pathway	KEGG PATHWAY	hsa04012	1	87	0.642061	0.853927	ENSG00000077264	hsa:5063|	5063|	http://www.genome.jp/kegg-bin/show_pathway?hsa04012/hsa:5063%09red
Hematopoietic cell lineage	KEGG PATHWAY	hsa04640	1	88	0.646223	0.853927	ENSG00000137070	hsa:3590|	3590|	http://www.genome.jp/kegg-bin/show_pathway?hsa04640/hsa:3590%09red
GABAergic synapse	KEGG PATHWAY	hsa04727	1	90	0.654404	0.853927	ENSG00000111665	hsa:2784|	2784|	http://www.genome.jp/kegg-bin/show_pathway?hsa04727/hsa:2784%09red
Salivary secretion	KEGG PATHWAY	hsa04970	1	90	0.654404	0.853927	ENSG00000152402	hsa:2977|	2977|	http://www.genome.jp/kegg-bin/show_pathway?hsa04970/hsa:2977%09red
mRNA surveillance pathway	KEGG PATHWAY	hsa03015	1	91	0.658423	0.853927	ENSG00000170935	hsa:22916|	22916|	http://www.genome.jp/kegg-bin/show_pathway?hsa03015/hsa:22916%09red
Glycerophospholipid metabolism	KEGG PATHWAY	hsa00564	1	92	0.662395	0.853927	ENSG00000136267	hsa:1607|	1607|	http://www.genome.jp/kegg-bin/show_pathway?hsa00564/hsa:1607%09red
Morphine addiction	KEGG PATHWAY	hsa05032	1	93	0.666322	0.853927	ENSG00000111665	hsa:2784|	2784|	http://www.genome.jp/kegg-bin/show_pathway?hsa05032/hsa:2784%09red
Estrogen signaling pathway	KEGG PATHWAY	hsa04915	1	100	0.692563	0.856094	ENSG00000091831	hsa:2099|	2099|	http://www.genome.jp/kegg-bin/show_pathway?hsa04915/hsa:2099%09red
Melanogenesis	KEGG PATHWAY	hsa04916	1	101	0.69614	0.856094	ENSG00000151617	hsa:1910|	1910|	http://www.genome.jp/kegg-bin/show_pathway?hsa04916/hsa:1910%09red
Viral carcinogenesis	KEGG PATHWAY	hsa05203	2	206	0.6968	0.856094	ENSG00000117399|ENSG00000145386	hsa:991|hsa:890|	991|890|	http://www.genome.jp/kegg-bin/show_pathway?hsa05203/hsa:991%09red/hsa:890%09red
Retrograde endocannabinoid signaling	KEGG PATHWAY	hsa04723	1	103	0.70317	0.856094	ENSG00000111665	hsa:2784|	2784|	http://www.genome.jp/kegg-bin/show_pathway?hsa04723/hsa:2784%09red
T cell receptor signaling pathway	KEGG PATHWAY	hsa04660	1	104	0.706624	0.856094	ENSG00000077264	hsa:5063|	5063|	http://www.genome.jp/kegg-bin/show_pathway?hsa04660/hsa:5063%09red
Pyrimidine metabolism	KEGG PATHWAY	hsa00240	1	105	0.710038	0.856094	ENSG00000171848	hsa:6241|	6241|	http://www.genome.jp/kegg-bin/show_pathway?hsa00240/hsa:6241%09red
HIF-1 signaling pathway	KEGG PATHWAY	hsa04066	1	106	0.713412	0.856094	ENSG00000186197	hsa:2026|	2026|	http://www.genome.jp/kegg-bin/show_pathway?hsa04066/hsa:2026%09red
Amoebiasis	KEGG PATHWAY	hsa05146	1	109	0.723302	0.860143	ENSG00000060718	hsa:1301|	1301|	http://www.genome.jp/kegg-bin/show_pathway?hsa05146/hsa:1301%09red
Cholinergic synapse	KEGG PATHWAY	hsa04725	1	113	0.735962	0.867383	ENSG00000111665	hsa:2784|	2784|	http://www.genome.jp/kegg-bin/show_pathway?hsa04725/hsa:2784%09red
Thyroid hormone signaling pathway	KEGG PATHWAY	hsa04919	1	119	0.753877	0.880635	ENSG00000091831	hsa:2099|	2099|	http://www.genome.jp/kegg-bin/show_pathway?hsa04919/hsa:2099%09red
Lysosome	KEGG PATHWAY	hsa04142	1	122	0.762375	0.88275	ENSG00000136943	hsa:1515|	1515|	http://www.genome.jp/kegg-bin/show_pathway?hsa04142/hsa:1515%09red
Spliceosome	KEGG PATHWAY	hsa03040	1	130	0.783634	0.899475	ENSG00000170935	hsa:22916|	22916|	http://www.genome.jp/kegg-bin/show_pathway?hsa03040/hsa:22916%09red
Oxidative phosphorylation	KEGG PATHWAY	hsa00190	1	133	0.791108	0.900226	ENSG00000237406	hsa:4704|	4704|	http://www.genome.jp/kegg-bin/show_pathway?hsa00190/hsa:4704%09red
Signaling pathways regulating pluripotency of stem cells	KEGG PATHWAY	hsa04550	1	142	0.812021	0.91473	ENSG00000122641	hsa:3624|	3624|	http://www.genome.jp/kegg-bin/show_pathway?hsa04550/hsa:3624%09red
Cytokine-cytokine receptor interaction	KEGG PATHWAY	hsa04060	2	265	0.817713	0.91473	ENSG00000122641|ENSG00000137070	hsa:3624|hsa:3590|	3624|3590|	http://www.genome.jp/kegg-bin/show_pathway?hsa04060/hsa:3590%09red/hsa:3624%09red
Non-alcoholic fatty liver disease (NAFLD)	KEGG PATHWAY	hsa04932	1	151	0.830847	0.916889	ENSG00000237406	hsa:4704|	4704|	http://www.genome.jp/kegg-bin/show_pathway?hsa04932/hsa:4704%09red
Phagosome	KEGG PATHWAY	hsa04145	1	155	0.8386	0.916889	ENSG00000104833	hsa:10382|	10382|	http://www.genome.jp/kegg-bin/show_pathway?hsa04145/hsa:10382%09red
Jak-STAT signaling pathway	KEGG PATHWAY	hsa04630	1	156	0.840482	0.916889	ENSG00000137070	hsa:3590|	3590|	http://www.genome.jp/kegg-bin/show_pathway?hsa04630/hsa:3590%09red
RNA transport	KEGG PATHWAY	hsa03013	1	163	0.853058	0.922981	ENSG00000170935	hsa:22916|	22916|	http://www.genome.jp/kegg-bin/show_pathway?hsa03013/hsa:22916%09red
Transcriptional misregulation in cancer	KEGG PATHWAY	hsa05202	1	179	0.878217	0.934174	ENSG00000134323	hsa:4613|	4613|	http://www.genome.jp/kegg-bin/show_pathway?hsa05202/hsa:4613%09red
Huntington's disease	KEGG PATHWAY	hsa05016	1	183	0.883805	0.934174	ENSG00000237406	hsa:4704|	4704|	http://www.genome.jp/kegg-bin/show_pathway?hsa05016/hsa:4704%09red
Herpes simplex infection	KEGG PATHWAY	hsa05168	1	186	0.887827	0.934174	ENSG00000254840	hsa:2969|	2969|	http://www.genome.jp/kegg-bin/show_pathway?hsa05168/hsa:2969%09red
Chemokine signaling pathway	KEGG PATHWAY	hsa04062	1	189	0.891711	0.934174	ENSG00000111665	hsa:2784|	2784|	http://www.genome.jp/kegg-bin/show_pathway?hsa04062/hsa:2784%09red
Epstein-Barr virus infection	KEGG PATHWAY	hsa05169	1	202	0.90705	0.937692	ENSG00000145386	hsa:890|	890|	http://www.genome.jp/kegg-bin/show_pathway?hsa05169/hsa:890%09red
PI3K-Akt signaling pathway	KEGG PATHWAY	hsa04151	2	347	0.914359	0.937692	ENSG00000060718|ENSG00000111665	hsa:1301|hsa:2784|	1301|2784|	http://www.genome.jp/kegg-bin/show_pathway?hsa04151/hsa:1301%09red/hsa:2784%09red
Rap1 signaling pathway	KEGG PATHWAY	hsa04015	1	211	0.916381	0.937692	ENSG00000171914	hsa:83660|	83660|	http://www.genome.jp/kegg-bin/show_pathway?hsa04015/hsa:83660%09red
MAPK signaling pathway	KEGG PATHWAY	hsa04010	1	257	0.951337	0.965973	ENSG00000182389	hsa:785|	785|	http://www.genome.jp/kegg-bin/show_pathway?hsa04010/hsa:785%09red
Pathways in cancer	KEGG PATHWAY	hsa05200	1	327	0.978691	0.986162	ENSG00000089685	hsa:332|	332|	http://www.genome.jp/kegg-bin/show_pathway?hsa05200/hsa:332%09red
Olfactory transduction	KEGG PATHWAY	hsa04740	1	405	0.991534	0.991534	ENSG00000180785	hsa:143503|	143503|	http://www.genome.jp/kegg-bin/show_pathway?hsa04740/hsa:143503%09red
--------------------
#Term	Database	ID	Input number	Background number	P-Value	Corrected P-Value	Input	KEGG_ID/KO	Entrez_ID	Hyperlink
--------------------
#Term	Database	ID	Input number	Background number	P-Value	Corrected P-Value	Input	KEGG_ID/KO	Entrez_ID	Hyperlink
--------------------
