# Supplementary material for: Effect of exogenous gonadotropin on the transcriptome of human granulosa cells and follicular fluid hormone profiles
Source: Reprod Biol Endocrinol. 2019 Jun 24;17:49. doi: 10.1186/s12958-019-0489-4 (PMC6591892; doi:10.1186/s12958-019-0489-4)
Supplement: Supplementary file 8 — Table S7. Pathway enrichment of genes up-regulated in the Gns group compared with the Control group. (XLSX 45 kb) [file 12958_2019_489_MOESM8_ESM.xlsx]

## Sheet: GnsvsCtrl_up.DEG_KEGG_pathway_e
Table S7. Pathway enrichment of genes up-regulated in the Gns group compared with the Control group.
##Databases: KEGG PATHWAY
##Statistical test method: hypergeometric test / Fisher's exact test
##FDR correction method: Benjamini and Hochberg
#Term	Database	ID	Input number	Background number	P-Value	Corrected P-Value	Input	KEGG_ID/KO	Entrez_ID	Hyperlink
Osteoclast differentiation	KEGG PATHWAY	hsa04380	37	131	1.57087e-12	3.11032e-10	ENSG00000102575|ENSG00000116701|ENSG00000165168|ENSG00000239998|ENSG00000232810|ENSG00000095585|ENSG00000163513|ENSG00000165178|ENSG00000204577|ENSG00000186818|ENSG00000141506|ENSG00000051523|ENSG00000072694|ENSG00000203747|ENSG00000141655|ENSG00000187116|ENSG00000011600|ENSG00000165025|ENSG00000010671|ENSG00000105609|ENSG00000066336|ENSG00000043462|ENSG00000125538|ENSG00000104972|ENSG00000115594…	hsa:54|hsa:4688|hsa:1536|hsa:11027|hsa:7124|hsa:29760|hsa:7048|hsa:653361|hsa:11025|hsa:11006|hsa:23533|hsa:1535|hsa:9103|hsa:2214|hsa:8792|hsa:353514|hsa:7305|hsa:6850|hsa:695|hsa:10990|hsa:6688|hsa:3937|hsa:3553|hsa:10859|hsa:3554|hsa:5294|hsa:140885|hsa:10288|hsa:8600|hsa:9021|hsa:4689|hsa:2212|hsa:4773|hsa:653361|hsa:653361|hsa:54209|hsa:79168|	54|4688|1536|11027|7124|29760|7048|653361|11025|11006|23533|1535|9103|2214|8792|353514|7305|6850|695|10990|6688|3937|3553|10859|3554|5294|140885|10288|8600|9021|4689|2212|4773|653361|653361|54209|79168|	http://www.genome.jp/kegg-bin/show_pathway?hsa04380/hsa:4688%09red/hsa:4689%09red/hsa:8792%09red/hsa:29760%09red/hsa:3937%09red/hsa:6850%09red/hsa:54209%09red/hsa:7124%09red/hsa:4773%09red/hsa:353514%09red/hsa:7305%09red/hsa:6688%09red/hsa:79168%09red/hsa:8600%09red/hsa:2214%09red/hsa:3553%09red/hsa:10288%09red/hsa:3554%09red/hsa:5294%09red/hsa:23533%09red/hsa:2212%09red/hsa:653361%09red/hsa:1535…
Leishmaniasis	KEGG PATHWAY	hsa05140	26	74	6.45028e-11	5.85549e-09	ENSG00000203710|ENSG00000242574|ENSG00000223865|ENSG00000137462|ENSG00000224557|ENSG00000166501|ENSG00000237541|ENSG00000204287|ENSG00000232810|ENSG00000136634|ENSG00000165178|ENSG00000250771|ENSG00000160255|ENSG00000051523|ENSG00000072694|ENSG00000203747|ENSG00000241106|ENSG00000116701|ENSG00000125538|ENSG00000169896|ENSG00000204257|ENSG00000100365|ENSG00000143226|ENSG00000158517|ENSG00000182487…	hsa:1378|hsa:3109|hsa:3115|hsa:7097|hsa:3115|hsa:5579|hsa:3118|hsa:3122|hsa:7124|hsa:3586|hsa:653361|hsa:7097|hsa:3689|hsa:1535|hsa:9103|hsa:2214|hsa:3112|hsa:4688|hsa:3553|hsa:3684|hsa:3108|hsa:4689|hsa:2212|hsa:653361|hsa:653361|hsa:3117|	1378|3109|3115|7097|3115|5579|3118|3122|7124|3586|653361|7097|3689|1535|9103|2214|3112|4688|3553|3684|3108|4689|2212|653361|653361|3117|	http://www.genome.jp/kegg-bin/show_pathway?hsa05140/hsa:4688%09red/hsa:4689%09red/hsa:1378%09red/hsa:5579%09red/hsa:7097%09red/hsa:7124%09red/hsa:2212%09red/hsa:2214%09red/hsa:3108%09red/hsa:3109%09red/hsa:3122%09red/hsa:3553%09red/hsa:653361%09red/hsa:1535%09red/hsa:3689%09red/hsa:3586%09red/hsa:3684%09red/hsa:3112%09red/hsa:3115%09red/hsa:3117%09red/hsa:3118%09red/hsa:9103%09red
Staphylococcus aureus infection	KEGG PATHWAY	hsa05150	23	57	8.87195e-11	5.85549e-09	ENSG00000242574|ENSG00000223865|ENSG00000224557|ENSG00000237541|ENSG00000171051|ENSG00000204287|ENSG00000136634|ENSG00000160255|ENSG00000197405|ENSG00000072694|ENSG00000169403|ENSG00000090339|ENSG00000241106|ENSG00000203747|ENSG00000197766|ENSG00000171049|ENSG00000186431|ENSG00000169896|ENSG00000204257|ENSG00000187474|ENSG00000143226|ENSG00000171860|ENSG00000196735	hsa:3109|hsa:3115|hsa:3115|hsa:3118|hsa:2357|hsa:3122|hsa:3586|hsa:3689|hsa:728|hsa:9103|hsa:5724|hsa:3383|hsa:3112|hsa:2214|hsa:1675|hsa:2358|hsa:2204|hsa:3684|hsa:3108|hsa:2359|hsa:2212|hsa:719|hsa:3117|	3109|3115|3115|3118|2357|3122|3586|3689|728|9103|5724|3383|3112|2214|1675|2358|2204|3684|3108|2359|2212|719|3117|	http://www.genome.jp/kegg-bin/show_pathway?hsa05150/hsa:3383%09red/hsa:728%09red/hsa:1675%09red/hsa:2358%09red/hsa:2359%09red/hsa:2212%09red/hsa:2214%09red/hsa:3108%09red/hsa:3109%09red/hsa:3122%09red/hsa:5724%09red/hsa:2357%09red/hsa:719%09red/hsa:3689%09red/hsa:3586%09red/hsa:3684%09red/hsa:3112%09red/hsa:3115%09red/hsa:3117%09red/hsa:3118%09red/hsa:2204%09red/hsa:9103%09red
Cytokine-cytokine receptor interaction	KEGG PATHWAY	hsa04060	49	265	2.68325e-10	1.32821e-08	ENSG00000120659|ENSG00000151882|ENSG00000125538|ENSG00000121807|ENSG00000163734|ENSG00000099985|ENSG00000163736|ENSG00000232810|ENSG00000136634|ENSG00000106952|ENSG00000275302|ENSG00000169429|ENSG00000121966|ENSG00000101017|ENSG00000110324|ENSG00000115594|ENSG00000122025|ENSG00000163823|ENSG00000226979|ENSG00000160791|ENSG00000141655|ENSG00000163513|ENSG00000276070|ENSG00000186891|ENSG00000102962…	hsa:8600|hsa:56477|hsa:3553|hsa:729230|hsa:2921|hsa:5008|hsa:5473|hsa:7124|hsa:3586|hsa:944|hsa:6351|hsa:3576|hsa:7852|hsa:958|hsa:3587|hsa:3554|hsa:2322|hsa:1230|hsa:4049|hsa:1234|hsa:8792|hsa:7048|hsa:6351|hsa:8784|hsa:6367|hsa:2920|hsa:6355|hsa:8743|hsa:6347|hsa:6364|hsa:3570|hsa:1438|hsa:414062|hsa:8740|hsa:943|hsa:10673|hsa:7850|hsa:3569|hsa:1439|hsa:6348|hsa:1235|hsa:7293|hsa:64109|hsa:6354…	8600|56477|3553|729230|2921|5008|5473|7124|3586|944|6351|3576|7852|958|3587|3554|2322|1230|4049|1234|8792|7048|6351|8784|6367|2920|6355|8743|6347|6364|3570|1438|414062|8740|943|10673|7850|3569|1439|6348|1235|7293|64109|6354|8809|8807|7133|3606|1441|	http://www.genome.jp/kegg-bin/show_pathway?hsa04060/hsa:3569%09red/hsa:1230%09red/hsa:8809%09red/hsa:1234%09red/hsa:3606%09red/hsa:8792%09red/hsa:5008%09red/hsa:7293%09red/hsa:1441%09red/hsa:10673%09red/hsa:4049%09red/hsa:414062%09red/hsa:944%09red/hsa:56477%09red/hsa:2921%09red/hsa:2920%09red/hsa:7124%09red/hsa:6364%09red/hsa:6367%09red/hsa:1235%09red/hsa:6347%09red/hsa:5473%09red/hsa:8740%09red…
Rheumatoid arthritis	KEGG PATHWAY	hsa05323	26	91	2.57663e-09	1.02035e-07	ENSG00000102575|ENSG00000242574|ENSG00000223865|ENSG00000137462|ENSG00000125538|ENSG00000224557|ENSG00000237541|ENSG00000204287|ENSG00000232810|ENSG00000108691|ENSG00000250771|ENSG00000169429|ENSG00000114013|ENSG00000136244|ENSG00000090339|ENSG00000241106|ENSG00000115009|ENSG00000160255|ENSG00000276085|ENSG00000102524|ENSG00000141655|ENSG00000277632|ENSG00000204257|ENSG00000120659|ENSG00000150782…	hsa:54|hsa:3109|hsa:3115|hsa:7097|hsa:3553|hsa:3115|hsa:3118|hsa:3122|hsa:7124|hsa:6347|hsa:7097|hsa:3576|hsa:942|hsa:3569|hsa:3383|hsa:3112|hsa:6364|hsa:3689|hsa:414062|hsa:10673|hsa:8792|hsa:6348|hsa:3108|hsa:8600|hsa:3606|hsa:3117|	54|3109|3115|7097|3553|3115|3118|3122|7124|6347|7097|3576|942|3569|3383|3112|6364|3689|414062|10673|8792|6348|3108|8600|3606|3117|	http://www.genome.jp/kegg-bin/show_pathway?hsa05323/hsa:3569%09red/hsa:3606%09red/hsa:8792%09red/hsa:10673%09red/hsa:414062%09red/hsa:942%09red/hsa:7097%09red/hsa:7124%09red/hsa:6364%09red/hsa:3383%09red/hsa:6347%09red/hsa:3108%09red/hsa:3109%09red/hsa:3122%09red/hsa:8600%09red/hsa:6348%09red/hsa:3553%09red/hsa:3576%09red/hsa:3689%09red/hsa:54%09red/hsa:3112%09red/hsa:3115%09red/hsa:3117%09red/hs…
Tuberculosis	KEGG PATHWAY	hsa05152	35	179	2.78743e-08	9.1985e-07	ENSG00000203710|ENSG00000242574|ENSG00000223865|ENSG00000166523|ENSG00000137462|ENSG00000130592|ENSG00000224557|ENSG00000237541|ENSG00000204287|ENSG00000232810|ENSG00000136634|ENSG00000164047|ENSG00000250771|ENSG00000160255|ENSG00000110324|ENSG00000072694|ENSG00000136244|ENSG00000111424|ENSG00000174125|ENSG00000170458|ENSG00000187796|ENSG00000241106|ENSG00000203747|ENSG00000165025|ENSG00000260314…	hsa:1378|hsa:3109|hsa:3115|hsa:26253|hsa:7097|hsa:4046|hsa:3115|hsa:3118|hsa:3122|hsa:7124|hsa:3586|hsa:820|hsa:7097|hsa:3689|hsa:3587|hsa:9103|hsa:3569|hsa:7421|hsa:7096|hsa:929|hsa:64170|hsa:3112|hsa:2214|hsa:6850|hsa:4360|hsa:3553|hsa:2207|hsa:3684|hsa:3687|hsa:3117|hsa:2212|hsa:1520|hsa:3606|hsa:3108|hsa:11151|	1378|3109|3115|26253|7097|4046|3115|3118|3122|7124|3586|820|7097|3689|3587|9103|3569|7421|7096|929|64170|3112|2214|6850|4360|3553|2207|3684|3687|3117|2212|1520|3606|3108|11151|	http://www.genome.jp/kegg-bin/show_pathway?hsa05152/hsa:3569%09red/hsa:1378%09red/hsa:4046%09red/hsa:6850%09red/hsa:929%09red/hsa:26253%09red/hsa:1520%09red/hsa:7097%09red/hsa:7124%09red/hsa:3606%09red/hsa:2212%09red/hsa:2214%09red/hsa:3108%09red/hsa:3109%09red/hsa:3122%09red/hsa:4360%09red/hsa:7096%09red/hsa:3553%09red/hsa:11151%09red/hsa:64170%09red/hsa:7421%09red/hsa:3118%09red/hsa:3689%09red/…
Phagosome	KEGG PATHWAY	hsa04145	32	155	3.63134e-08	1.02715e-06	ENSG00000242574|ENSG00000223865|ENSG00000137462|ENSG00000224557|ENSG00000237541|ENSG00000204287|ENSG00000005381|ENSG00000165178|ENSG00000250771|ENSG00000160255|ENSG00000038945|ENSG00000051523|ENSG00000072694|ENSG00000203747|ENSG00000019169|ENSG00000170458|ENSG00000241106|ENSG00000116701|ENSG00000158270|ENSG00000260314|ENSG00000276600|ENSG00000186431|ENSG00000169896|ENSG00000165168|ENSG00000204257…	hsa:3109|hsa:3115|hsa:7097|hsa:3115|hsa:3118|hsa:3122|hsa:4353|hsa:653361|hsa:7097|hsa:3689|hsa:4481|hsa:1535|hsa:9103|hsa:2214|hsa:8685|hsa:929|hsa:3112|hsa:4688|hsa:81035|hsa:4360|hsa:338382|hsa:2204|hsa:3684|hsa:1536|hsa:3108|hsa:4689|hsa:2212|hsa:1520|hsa:653361|hsa:653361|hsa:3117|hsa:11151|	3109|3115|7097|3115|3118|3122|4353|653361|7097|3689|4481|1535|9103|2214|8685|929|3112|4688|81035|4360|338382|2204|3684|1536|3108|4689|2212|1520|653361|653361|3117|11151|	http://www.genome.jp/kegg-bin/show_pathway?hsa04145/hsa:4688%09red/hsa:4689%09red/hsa:338382%09red/hsa:929%09red/hsa:1520%09red/hsa:7097%09red/hsa:2212%09red/hsa:2214%09red/hsa:3108%09red/hsa:3109%09red/hsa:3122%09red/hsa:4360%09red/hsa:11151%09red/hsa:8685%09red/hsa:653361%09red/hsa:1535%09red/hsa:1536%09red/hsa:3689%09red/hsa:81035%09red/hsa:3684%09red/hsa:3112%09red/hsa:3115%09red/hsa:3117%09r…
Hematopoietic cell lineage	KEGG PATHWAY	hsa04640	23	88	8.39039e-08	1.97941e-06	ENSG00000203710|ENSG00000158477|ENSG00000204287|ENSG00000232810|ENSG00000026508|ENSG00000105383|ENSG00000122025|ENSG00000010610|ENSG00000136244|ENSG00000158473|ENSG00000170458|ENSG00000169704|ENSG00000160712|ENSG00000198223|ENSG00000125538|ENSG00000115590|ENSG00000115594|ENSG00000104894|ENSG00000169896|ENSG00000158485|ENSG00000158481|ENSG00000119535|ENSG00000158488	hsa:1378|hsa:909|hsa:3122|hsa:7124|hsa:960|hsa:945|hsa:2322|hsa:920|hsa:3569|hsa:912|hsa:929|hsa:2815|hsa:3570|hsa:1438|hsa:3553|hsa:7850|hsa:3554|hsa:951|hsa:3684|hsa:910|hsa:911|hsa:1441|hsa:913|	1378|909|3122|7124|960|945|2322|920|3569|912|929|2815|3570|1438|3553|7850|3554|951|3684|910|911|1441|913|	http://www.genome.jp/kegg-bin/show_pathway?hsa04640/hsa:3569%09red/hsa:1378%09red/hsa:920%09red/hsa:1441%09red/hsa:929%09red/hsa:945%09red/hsa:7124%09red/hsa:960%09red/hsa:3122%09red/hsa:7850%09red/hsa:3553%09red/hsa:3554%09red/hsa:909%09red/hsa:3570%09red/hsa:2815%09red/hsa:951%09red/hsa:913%09red/hsa:912%09red/hsa:911%09red/hsa:910%09red/hsa:3684%09red/hsa:2322%09red/hsa:1438%09red
Chemokine signaling pathway	KEGG PATHWAY	hsa04062	35	189	8.9973e-08	1.97941e-06	ENSG00000151882|ENSG00000015285|ENSG00000121807|ENSG00000163734|ENSG00000166501|ENSG00000163736|ENSG00000275302|ENSG00000101336|ENSG00000165178|ENSG00000169429|ENSG00000121966|ENSG00000141506|ENSG00000134516|ENSG00000163823|ENSG00000160791|ENSG00000141480|ENSG00000276070|ENSG00000102962|ENSG00000081041|ENSG00000108700|ENSG00000108691|ENSG00000115009|ENSG00000276085|ENSG00000121281|ENSG00000112486…	hsa:56477|hsa:7454|hsa:729230|hsa:2921|hsa:5579|hsa:5473|hsa:6351|hsa:3055|hsa:653361|hsa:3576|hsa:7852|hsa:23533|hsa:1794|hsa:1230|hsa:1234|hsa:409|hsa:6351|hsa:6367|hsa:2920|hsa:6355|hsa:6347|hsa:6364|hsa:414062|hsa:113|hsa:1235|hsa:7409|hsa:196883|hsa:2268|hsa:6348|hsa:5294|hsa:6354|hsa:653361|hsa:653361|hsa:5330|hsa:2793|	56477|7454|729230|2921|5579|5473|6351|3055|653361|3576|7852|23533|1794|1230|1234|409|6351|6367|2920|6355|6347|6364|414062|113|1235|7409|196883|2268|6348|5294|6354|653361|653361|5330|2793|	http://www.genome.jp/kegg-bin/show_pathway?hsa04062/hsa:1230%09red/hsa:409%09red/hsa:1234%09red/hsa:1235%09red/hsa:2793%09red/hsa:414062%09red/hsa:5579%09red/hsa:6354%09red/hsa:56477%09red/hsa:7454%09red/hsa:2921%09red/hsa:2920%09red/hsa:6364%09red/hsa:6367%09red/hsa:5330%09red/hsa:6347%09red/hsa:5473%09red/hsa:196883%09red/hsa:7852%09red/hsa:6348%09red/hsa:729230%09red/hsa:5294%09red/hsa:3576%09…
NF-kappa B signaling pathway	KEGG PATHWAY	hsa04064	23	91	1.40399e-07	2.67594e-06	ENSG00000102524|ENSG00000122861|ENSG00000166501|ENSG00000232810|ENSG00000095585|ENSG00000010671|ENSG00000275302|ENSG00000169429|ENSG00000101017|ENSG00000226979|ENSG00000140379|ENSG00000141655|ENSG00000276070|ENSG00000081041|ENSG00000090339|ENSG00000170458|ENSG00000165025|ENSG00000125735|ENSG00000125538|ENSG00000115594|ENSG00000120659|ENSG00000154589|ENSG00000099860	hsa:10673|hsa:5328|hsa:5579|hsa:7124|hsa:29760|hsa:695|hsa:6351|hsa:3576|hsa:958|hsa:4049|hsa:597|hsa:8792|hsa:6351|hsa:2920|hsa:3383|hsa:929|hsa:6850|hsa:8740|hsa:3553|hsa:3554|hsa:8600|hsa:23643|hsa:4616|	10673|5328|5579|7124|29760|695|6351|3576|958|4049|597|8792|6351|2920|3383|929|6850|8740|3553|3554|8600|23643|4616|	http://www.genome.jp/kegg-bin/show_pathway?hsa04064/hsa:3383%09red/hsa:8792%09red/hsa:29760%09red/hsa:5328%09red/hsa:23643%09red/hsa:10673%09red/hsa:6850%09red/hsa:929%09red/hsa:5579%09red/hsa:4049%09red/hsa:2920%09red/hsa:7124%09red/hsa:597%09red/hsa:4616%09red/hsa:8740%09red/hsa:8600%09red/hsa:3553%09red/hsa:3554%09red/hsa:3576%09red/hsa:695%09red/hsa:958%09red/hsa:6351%09red
Intestinal immune network for IgA production	KEGG PATHWAY	hsa04672	17	49	1.48663e-07	2.67594e-06	ENSG00000101017|ENSG00000114013|ENSG00000121966|ENSG00000242574|ENSG00000223865|ENSG00000196735|ENSG00000241106|ENSG00000224557|ENSG00000160223|ENSG00000237541|ENSG00000151882|ENSG00000102524|ENSG00000204287|ENSG00000136244|ENSG00000136634|ENSG00000204257|ENSG00000277117	hsa:958|hsa:942|hsa:7852|hsa:3109|hsa:3115|hsa:3117|hsa:3112|hsa:3115|hsa:23308|hsa:3118|hsa:56477|hsa:10673|hsa:3122|hsa:3569|hsa:3586|hsa:3108|hsa:23308|	958|942|7852|3109|3115|3117|3112|3115|23308|3118|56477|10673|3122|3569|3586|3108|23308|	http://www.genome.jp/kegg-bin/show_pathway?hsa04672/hsa:3569%09red/hsa:56477%09red/hsa:3586%09red/hsa:3117%09red/hsa:942%09red/hsa:23308%09red/hsa:958%09red/hsa:10673%09red/hsa:3112%09red/hsa:3115%09red/hsa:3108%09red/hsa:3109%09red/hsa:3118%09red/hsa:3122%09red/hsa:7852%09red
Asthma	KEGG PATHWAY	hsa05310	14	32	1.94726e-07	3.21298e-06	ENSG00000101017|ENSG00000224557|ENSG00000169397|ENSG00000241106|ENSG00000242574|ENSG00000223865|ENSG00000196735|ENSG00000179639|ENSG00000237541|ENSG00000204287|ENSG00000232810|ENSG00000136634|ENSG00000204257|ENSG00000158869	hsa:958|hsa:3115|hsa:6037|hsa:3112|hsa:3109|hsa:3115|hsa:3117|hsa:2205|hsa:3118|hsa:3122|hsa:7124|hsa:3586|hsa:3108|hsa:2207|	958|3115|6037|3112|3109|3115|3117|2205|3118|3122|7124|3586|3108|2207|	http://www.genome.jp/kegg-bin/show_pathway?hsa05310/hsa:3586%09red/hsa:3117%09red/hsa:7124%09red/hsa:3118%09red/hsa:6037%09red/hsa:958%09red/hsa:3112%09red/hsa:3115%09red/hsa:3108%09red/hsa:3109%09red/hsa:2207%09red/hsa:3122%09red/hsa:2205%09red
Inflammatory bowel disease (IBD)	KEGG PATHWAY	hsa05321	18	67	1.4977e-06	2.28111e-05	ENSG00000143365|ENSG00000204257|ENSG00000250771|ENSG00000241106|ENSG00000242574|ENSG00000196735|ENSG00000223865|ENSG00000137462|ENSG00000115604|ENSG00000115607|ENSG00000224557|ENSG00000150782|ENSG00000237541|ENSG00000125538|ENSG00000204287|ENSG00000136244|ENSG00000136634|ENSG00000232810	hsa:6097|hsa:3108|hsa:7097|hsa:3112|hsa:3109|hsa:3117|hsa:3115|hsa:7097|hsa:8809|hsa:8807|hsa:3115|hsa:3606|hsa:3118|hsa:3553|hsa:3122|hsa:3569|hsa:3586|hsa:7124|	6097|3108|7097|3112|3109|3117|3115|7097|8809|8807|3115|3606|3118|3553|3122|3569|3586|7124|	http://www.genome.jp/kegg-bin/show_pathway?hsa05321/hsa:3569%09red/hsa:3553%09red/hsa:8809%09red/hsa:3586%09red/hsa:8807%09red/hsa:3606%09red/hsa:7124%09red/hsa:7097%09red/hsa:6097%09red/hsa:3117%09red/hsa:3112%09red/hsa:3115%09red/hsa:3108%09red/hsa:3109%09red/hsa:3118%09red/hsa:3122%09red
Legionellosis	KEGG PATHWAY	hsa05134	16	55	2.38591e-06	3.37436e-05	ENSG00000081041|ENSG00000091106|ENSG00000169896|ENSG00000250771|ENSG00000169429|ENSG00000160255|ENSG00000137462|ENSG00000163734|ENSG00000150782|ENSG00000249437|ENSG00000125538|ENSG00000137752|ENSG00000136244|ENSG00000203710|ENSG00000232810|ENSG00000170458	hsa:2920|hsa:58484|hsa:3684|hsa:7097|hsa:3576|hsa:3689|hsa:7097|hsa:2921|hsa:3606|hsa:4671|hsa:3553|hsa:834|hsa:3569|hsa:1378|hsa:7124|hsa:929|	2920|58484|3684|7097|3576|3689|7097|2921|3606|4671|3553|834|3569|1378|7124|929|	http://www.genome.jp/kegg-bin/show_pathway?hsa05134/hsa:1378%09red/hsa:3569%09red/hsa:3553%09red/hsa:4671%09red/hsa:2921%09red/hsa:3606%09red/hsa:7124%09red/hsa:3689%09red/hsa:2920%09red/hsa:3684%09red/hsa:834%09red/hsa:3576%09red/hsa:58484%09red/hsa:7097%09red/hsa:929%09red
Malaria	KEGG PATHWAY	hsa05144	14	49	1.19803e-05	0.000158139	ENSG00000108691|ENSG00000090339|ENSG00000203710|ENSG00000250771|ENSG00000169429|ENSG00000101017|ENSG00000160255|ENSG00000137462|ENSG00000150782|ENSG00000261371|ENSG00000125538|ENSG00000136244|ENSG00000136634|ENSG00000232810	hsa:6347|hsa:3383|hsa:1378|hsa:7097|hsa:3576|hsa:958|hsa:3689|hsa:7097|hsa:3606|hsa:5175|hsa:3553|hsa:3569|hsa:3586|hsa:7124|	6347|3383|1378|7097|3576|958|3689|7097|3606|5175|3553|3569|3586|7124|	http://www.genome.jp/kegg-bin/show_pathway?hsa05144/hsa:1378%09red/hsa:3569%09red/hsa:3553%09red/hsa:3586%09red/hsa:3606%09red/hsa:7124%09red/hsa:3689%09red/hsa:3383%09red/hsa:3576%09red/hsa:958%09red/hsa:6347%09red/hsa:7097%09red/hsa:5175%09red
Allograft rejection	KEGG PATHWAY	hsa05330	12	39	2.71053e-05	0.000335428	ENSG00000101017|ENSG00000114013|ENSG00000242574|ENSG00000223865|ENSG00000196735|ENSG00000241106|ENSG00000224557|ENSG00000237541|ENSG00000204287|ENSG00000232810|ENSG00000136634|ENSG00000204257	hsa:958|hsa:942|hsa:3109|hsa:3115|hsa:3117|hsa:3112|hsa:3115|hsa:3118|hsa:3122|hsa:7124|hsa:3586|hsa:3108|	958|942|3109|3115|3117|3112|3115|3118|3122|7124|3586|3108|	http://www.genome.jp/kegg-bin/show_pathway?hsa05330/hsa:3586%09red/hsa:3117%09red/hsa:942%09red/hsa:7124%09red/hsa:958%09red/hsa:3112%09red/hsa:3115%09red/hsa:3108%09red/hsa:3109%09red/hsa:3118%09red/hsa:3122%09red
Amoebiasis	KEGG PATHWAY	hsa05146	20	109	5.51744e-05	0.000642619	ENSG00000158473|ENSG00000276600|ENSG00000105851|ENSG00000169896|ENSG00000250771|ENSG00000169429|ENSG00000160255|ENSG00000141506|ENSG00000137462|ENSG00000197632|ENSG00000232810|ENSG00000166501|ENSG00000125538|ENSG00000115590|ENSG00000136244|ENSG00000136634|ENSG00000060558|ENSG00000115594|ENSG00000137841|ENSG00000170458	hsa:912|hsa:338382|hsa:5294|hsa:3684|hsa:7097|hsa:3576|hsa:3689|hsa:23533|hsa:7097|hsa:5055|hsa:7124|hsa:5579|hsa:3553|hsa:7850|hsa:3569|hsa:3586|hsa:2769|hsa:3554|hsa:5330|hsa:929|	912|338382|5294|3684|7097|3576|3689|23533|7097|5055|7124|5579|3553|7850|3569|3586|2769|3554|5330|929|	http://www.genome.jp/kegg-bin/show_pathway?hsa05146/hsa:5579%09red/hsa:3569%09red/hsa:3553%09red/hsa:23533%09red/hsa:3586%09red/hsa:3554%09red/hsa:5330%09red/hsa:7124%09red/hsa:912%09red/hsa:3689%09red/hsa:7097%09red/hsa:5294%09red/hsa:3684%09red/hsa:3576%09red/hsa:338382%09red/hsa:2769%09red/hsa:929%09red/hsa:7850%09red/hsa:5055%09red
Graft-versus-host disease	KEGG PATHWAY	hsa05332	12	43	6.03795e-05	0.000664175	ENSG00000204257|ENSG00000114013|ENSG00000242574|ENSG00000223865|ENSG00000196735|ENSG00000241106|ENSG00000224557|ENSG00000237541|ENSG00000125538|ENSG00000204287|ENSG00000136244|ENSG00000232810	hsa:3108|hsa:942|hsa:3109|hsa:3115|hsa:3117|hsa:3112|hsa:3115|hsa:3118|hsa:3553|hsa:3122|hsa:3569|hsa:7124|	3108|942|3109|3115|3117|3112|3115|3118|3553|3122|3569|7124|	http://www.genome.jp/kegg-bin/show_pathway?hsa05332/hsa:3569%09red/hsa:3553%09red/hsa:3117%09red/hsa:942%09red/hsa:7124%09red/hsa:3112%09red/hsa:3115%09red/hsa:3108%09red/hsa:3109%09red/hsa:3118%09red/hsa:3122%09red
Type I diabetes mellitus	KEGG PATHWAY	hsa04940	12	45	8.74035e-05	0.000910836	ENSG00000114013|ENSG00000242574|ENSG00000223865|ENSG00000196735|ENSG00000241106|ENSG00000224557|ENSG00000226979|ENSG00000237541|ENSG00000125538|ENSG00000204287|ENSG00000232810|ENSG00000204257	hsa:942|hsa:3109|hsa:3115|hsa:3117|hsa:3112|hsa:3115|hsa:4049|hsa:3118|hsa:3553|hsa:3122|hsa:7124|hsa:3108|	942|3109|3115|3117|3112|3115|4049|3118|3553|3122|7124|3108|	http://www.genome.jp/kegg-bin/show_pathway?hsa04940/hsa:3553%09red/hsa:3117%09red/hsa:942%09red/hsa:7124%09red/hsa:3112%09red/hsa:3115%09red/hsa:3108%09red/hsa:3109%09red/hsa:3118%09red/hsa:3122%09red/hsa:4049%09red
Toll-like receptor signaling pathway	KEGG PATHWAY	hsa04620	19	106	0.000110021	0.0010892	ENSG00000275302|ENSG00000277632|ENSG00000105851|ENSG00000170458|ENSG00000250771|ENSG00000169429|ENSG00000114013|ENSG00000101017|ENSG00000276085|ENSG00000141506|ENSG00000137462|ENSG00000154589|ENSG00000101916|ENSG00000125538|ENSG00000174125|ENSG00000136244|ENSG00000276070|ENSG00000232810|ENSG00000196664	hsa:6351|hsa:6348|hsa:5294|hsa:929|hsa:7097|hsa:3576|hsa:942|hsa:958|hsa:414062|hsa:23533|hsa:7097|hsa:23643|hsa:51311|hsa:3553|hsa:7096|hsa:3569|hsa:6351|hsa:7124|hsa:51284|	6351|6348|5294|929|7097|3576|942|958|414062|23533|7097|23643|51311|3553|7096|3569|6351|7124|51284|	http://www.genome.jp/kegg-bin/show_pathway?hsa04620/hsa:51311%09red/hsa:3569%09red/hsa:3553%09red/hsa:23533%09red/hsa:7096%09red/hsa:942%09red/hsa:7097%09red/hsa:7124%09red/hsa:5294%09red/hsa:23643%09red/hsa:3576%09red/hsa:958%09red/hsa:6351%09red/hsa:51284%09red/hsa:929%09red/hsa:414062%09red/hsa:6348%09red
NOD-like receptor signaling pathway	KEGG PATHWAY	hsa04621	13	57	0.00017385	0.00163916	ENSG00000081041|ENSG00000108691|ENSG00000249437|ENSG00000187796|ENSG00000169429|ENSG00000162711|ENSG00000150782|ENSG00000125538|ENSG00000137752|ENSG00000136244|ENSG00000137757|ENSG00000232810|ENSG00000091106	hsa:2920|hsa:6347|hsa:4671|hsa:64170|hsa:3576|hsa:114548|hsa:3606|hsa:3553|hsa:834|hsa:3569|hsa:838|hsa:7124|hsa:58484|	2920|6347|4671|64170|3576|114548|3606|3553|834|3569|838|7124|58484|	http://www.genome.jp/kegg-bin/show_pathway?hsa04621/hsa:834%09red/hsa:3569%09red/hsa:3553%09red/hsa:114548%09red/hsa:4671%09red/hsa:3606%09red/hsa:7124%09red/hsa:2920%09red/hsa:838%09red/hsa:3576%09red/hsa:6347%09red/hsa:64170%09red/hsa:58484%09red
Salmonella infection	KEGG PATHWAY	hsa05132	15	86	0.00072044	0.00648396	ENSG00000081041|ENSG00000275302|ENSG00000277632|ENSG00000170458|ENSG00000169429|ENSG00000015285|ENSG00000276085|ENSG00000163734|ENSG00000150782|ENSG00000125538|ENSG00000137752|ENSG00000136244|ENSG00000276600|ENSG00000276070|ENSG00000091106	hsa:2920|hsa:6351|hsa:6348|hsa:929|hsa:3576|hsa:7454|hsa:414062|hsa:2921|hsa:3606|hsa:3553|hsa:834|hsa:3569|hsa:338382|hsa:6351|hsa:58484|	2920|6351|6348|929|3576|7454|414062|2921|3606|3553|834|3569|338382|6351|58484|	http://www.genome.jp/kegg-bin/show_pathway?hsa05132/hsa:834%09red/hsa:3569%09red/hsa:3553%09red/hsa:7454%09red/hsa:2921%09red/hsa:3606%09red/hsa:58484%09red/hsa:2920%09red/hsa:3576%09red/hsa:6351%09red/hsa:338382%09red/hsa:929%09red/hsa:414062%09red/hsa:6348%09red
Viral myocarditis	KEGG PATHWAY	hsa05416	12	60	0.000849365	0.00731193	ENSG00000090339|ENSG00000101017|ENSG00000114013|ENSG00000242574|ENSG00000160255|ENSG00000223865|ENSG00000196735|ENSG00000241106|ENSG00000224557|ENSG00000237541|ENSG00000204287|ENSG00000204257	hsa:3383|hsa:958|hsa:942|hsa:3109|hsa:3689|hsa:3115|hsa:3117|hsa:3112|hsa:3115|hsa:3118|hsa:3122|hsa:3108|	3383|958|942|3109|3689|3115|3117|3112|3115|3118|3122|3108|	http://www.genome.jp/kegg-bin/show_pathway?hsa05416/hsa:3689%09red/hsa:3117%09red/hsa:942%09red/hsa:3383%09red/hsa:958%09red/hsa:3112%09red/hsa:3115%09red/hsa:3108%09red/hsa:3109%09red/hsa:3118%09red/hsa:3122%09red
Toxoplasmosis	KEGG PATHWAY	hsa05145	18	120	0.00108538	0.00873862	ENSG00000105851|ENSG00000160791|ENSG00000250771|ENSG00000101017|ENSG00000241106|ENSG00000242574|ENSG00000196735|ENSG00000223865|ENSG00000141506|ENSG00000137462|ENSG00000154589|ENSG00000224557|ENSG00000110324|ENSG00000237541|ENSG00000204287|ENSG00000232810|ENSG00000136634|ENSG00000204257	hsa:5294|hsa:1234|hsa:7097|hsa:958|hsa:3112|hsa:3109|hsa:3117|hsa:3115|hsa:23533|hsa:7097|hsa:23643|hsa:3115|hsa:3587|hsa:3118|hsa:3122|hsa:7124|hsa:3586|hsa:3108|	5294|1234|7097|958|3112|3109|3117|3115|23533|7097|23643|3115|3587|3118|3122|7124|3586|3108|	http://www.genome.jp/kegg-bin/show_pathway?hsa05145/hsa:23533%09red/hsa:3586%09red/hsa:3117%09red/hsa:1234%09red/hsa:7097%09red/hsa:7124%09red/hsa:5294%09red/hsa:23643%09red/hsa:958%09red/hsa:3112%09red/hsa:3115%09red/hsa:3108%09red/hsa:3109%09red/hsa:3118%09red/hsa:3122%09red/hsa:3587%09red
TNF signaling pathway	KEGG PATHWAY	hsa04668	17	110	0.00110336	0.00873862	ENSG00000081041|ENSG00000108691|ENSG00000129465|ENSG00000105851|ENSG00000090339|ENSG00000115009|ENSG00000168404|ENSG00000184557|ENSG00000141506|ENSG00000115604|ENSG00000028137|ENSG00000163734|ENSG00000226979|ENSG00000125538|ENSG00000100985|ENSG00000136244|ENSG00000232810	hsa:2920|hsa:6347|hsa:11035|hsa:5294|hsa:3383|hsa:6364|hsa:197259|hsa:9021|hsa:23533|hsa:8809|hsa:7133|hsa:2921|hsa:4049|hsa:3553|hsa:4318|hsa:3569|hsa:7124|	2920|6347|11035|5294|3383|6364|197259|9021|23533|8809|7133|2921|4049|3553|4318|3569|7124|	http://www.genome.jp/kegg-bin/show_pathway?hsa04668/hsa:3569%09red/hsa:4318%09red/hsa:23533%09red/hsa:2921%09red/hsa:2920%09red/hsa:7124%09red/hsa:7133%09red/hsa:197259%09red/hsa:5294%09red/hsa:3553%09red/hsa:6347%09red/hsa:11035%09red/hsa:3383%09red/hsa:6364%09red/hsa:4049%09red/hsa:9021%09red/hsa:8809%09red
B cell receptor signaling pathway	KEGG PATHWAY	hsa04662	13	72	0.0012071	0.00888263	ENSG00000165025|ENSG00000105851|ENSG00000010671|ENSG00000070190|ENSG00000204577|ENSG00000141506|ENSG00000155629|ENSG00000137101|ENSG00000166501|ENSG00000101096|ENSG00000095585|ENSG00000141968|ENSG00000168918	hsa:6850|hsa:5294|hsa:695|hsa:27071|hsa:11025|hsa:23533|hsa:118788|hsa:971|hsa:5579|hsa:4773|hsa:29760|hsa:7409|hsa:3635|	6850|5294|695|27071|11025|23533|118788|971|5579|4773|29760|7409|3635|	http://www.genome.jp/kegg-bin/show_pathway?hsa04662/hsa:971%09red/hsa:5579%09red/hsa:23533%09red/hsa:7409%09red/hsa:118788%09red/hsa:5294%09red/hsa:29760%09red/hsa:27071%09red/hsa:3635%09red/hsa:4773%09red/hsa:11025%09red/hsa:6850%09red/hsa:695%09red
Autoimmune thyroid disease	KEGG PATHWAY	hsa05320	11	54	0.00121127	0.00888263	ENSG00000101017|ENSG00000114013|ENSG00000242574|ENSG00000223865|ENSG00000196735|ENSG00000241106|ENSG00000224557|ENSG00000237541|ENSG00000204287|ENSG00000136634|ENSG00000204257	hsa:958|hsa:942|hsa:3109|hsa:3115|hsa:3117|hsa:3112|hsa:3115|hsa:3118|hsa:3122|hsa:3586|hsa:3108|	958|942|3109|3115|3117|3112|3115|3118|3122|3586|3108|	http://www.genome.jp/kegg-bin/show_pathway?hsa05320/hsa:3586%09red/hsa:3117%09red/hsa:942%09red/hsa:958%09red/hsa:3112%09red/hsa:3115%09red/hsa:3108%09red/hsa:3109%09red/hsa:3118%09red/hsa:3122%09red
Influenza A	KEGG PATHWAY	hsa05164	23	177	0.00140626	0.00994425	ENSG00000242574|ENSG00000223865|ENSG00000224557|ENSG00000166501|ENSG00000237541|ENSG00000204287|ENSG00000232810|ENSG00000108691|ENSG00000169429|ENSG00000141506|ENSG00000162711|ENSG00000137752|ENSG00000136244|ENSG00000121858|ENSG00000090339|ENSG00000241106|ENSG00000125538|ENSG00000105851|ENSG00000204257|ENSG00000184557|ENSG00000150782|ENSG00000196735|ENSG00000196664	hsa:3109|hsa:3115|hsa:3115|hsa:5579|hsa:3118|hsa:3122|hsa:7124|hsa:6347|hsa:3576|hsa:23533|hsa:114548|hsa:834|hsa:3569|hsa:8743|hsa:3383|hsa:3112|hsa:3553|hsa:5294|hsa:3108|hsa:9021|hsa:3606|hsa:3117|hsa:51284|	3109|3115|3115|5579|3118|3122|7124|6347|3576|23533|114548|834|3569|8743|3383|3112|3553|5294|3108|9021|3606|3117|51284|	http://www.genome.jp/kegg-bin/show_pathway?hsa05164/hsa:3569%09red/hsa:3606%09red/hsa:51284%09red/hsa:5579%09red/hsa:7124%09red/hsa:3383%09red/hsa:6347%09red/hsa:3108%09red/hsa:3109%09red/hsa:8743%09red/hsa:3553%09red/hsa:5294%09red/hsa:3576%09red/hsa:114548%09red/hsa:3122%09red/hsa:834%09red/hsa:23533%09red/hsa:3112%09red/hsa:3115%09red/hsa:3117%09red/hsa:3118%09red/hsa:9021%09red
Leukocyte transendothelial migration	KEGG PATHWAY	hsa04670	17	118	0.00216171	0.0147592	ENSG00000105851|ENSG00000169896|ENSG00000090339|ENSG00000165168|ENSG00000121966|ENSG00000165178|ENSG00000116701|ENSG00000100365|ENSG00000160255|ENSG00000141506|ENSG00000051523|ENSG00000158517|ENSG00000261371|ENSG00000182487|ENSG00000100985|ENSG00000141968|ENSG00000166501	hsa:5294|hsa:3684|hsa:3383|hsa:1536|hsa:7852|hsa:653361|hsa:4688|hsa:4689|hsa:3689|hsa:23533|hsa:1535|hsa:653361|hsa:5175|hsa:653361|hsa:4318|hsa:7409|hsa:5579|	5294|3684|3383|1536|7852|653361|4688|4689|3689|23533|1535|653361|5175|653361|4318|7409|5579|	http://www.genome.jp/kegg-bin/show_pathway?hsa04670/hsa:5579%09red/hsa:4688%09red/hsa:4318%09red/hsa:23533%09red/hsa:3383%09red/hsa:3689%09red/hsa:5294%09red/hsa:3684%09red/hsa:4689%09red/hsa:7409%09red/hsa:5175%09red/hsa:653361%09red/hsa:1535%09red/hsa:7852%09red/hsa:1536%09red
African trypanosomiasis	KEGG PATHWAY	hsa05143	8	34	0.00256252	0.0165405	ENSG00000090339|ENSG00000150782|ENSG00000125538|ENSG00000136244|ENSG00000136634|ENSG00000232810|ENSG00000137841|ENSG00000166501	hsa:3383|hsa:3606|hsa:3553|hsa:3569|hsa:3586|hsa:7124|hsa:5330|hsa:5579|	3383|3606|3553|3569|3586|7124|5330|5579|	http://www.genome.jp/kegg-bin/show_pathway?hsa05143/hsa:5579%09red/hsa:3569%09red/hsa:3553%09red/hsa:3586%09red/hsa:5330%09red/hsa:7124%09red/hsa:3383%09red/hsa:3606%09red
Platelet activation	KEGG PATHWAY	hsa04611	18	131	0.00258968	0.0165405	ENSG00000129467|ENSG00000077420|ENSG00000160013|ENSG00000105851|ENSG00000010671|ENSG00000043462|ENSG00000149781|ENSG00000169704|ENSG00000059377|ENSG00000233261|ENSG00000143226|ENSG00000095303|ENSG00000118640|ENSG00000121281|ENSG00000165025|ENSG00000141506|ENSG00000137841|ENSG00000158869	hsa:196883|hsa:54518|hsa:5739|hsa:5294|hsa:695|hsa:3937|hsa:83706|hsa:2815|hsa:6916|hsa:54518|hsa:2212|hsa:5742|hsa:8673|hsa:113|hsa:6850|hsa:23533|hsa:5330|hsa:2207|	196883|54518|5739|5294|695|3937|83706|2815|6916|54518|2212|5742|8673|113|6850|23533|5330|2207|	http://www.genome.jp/kegg-bin/show_pathway?hsa04611/hsa:695%09red/hsa:2815%09red/hsa:23533%09red/hsa:5330%09red/hsa:5742%09red/hsa:54518%09red/hsa:83706%09red/hsa:5294%09red/hsa:6850%09red/hsa:113%09red/hsa:5739%09red/hsa:2212%09red/hsa:3937%09red/hsa:196883%09red/hsa:6916%09red/hsa:2207%09red/hsa:8673%09red
Fc gamma R-mediated phagocytosis	KEGG PATHWAY	hsa04666	14	91	0.00302813	0.0182277	ENSG00000101336|ENSG00000165025|ENSG00000105851|ENSG00000203747|ENSG00000015285|ENSG00000141506|ENSG00000158517|ENSG00000143226|ENSG00000134516|ENSG00000168918|ENSG00000182487|ENSG00000165178|ENSG00000141968|ENSG00000166501	hsa:3055|hsa:6850|hsa:5294|hsa:2214|hsa:7454|hsa:23533|hsa:653361|hsa:2212|hsa:1794|hsa:3635|hsa:653361|hsa:653361|hsa:7409|hsa:5579|	3055|6850|5294|2214|7454|23533|653361|2212|1794|3635|653361|653361|7409|5579|	http://www.genome.jp/kegg-bin/show_pathway?hsa04666/hsa:5579%09red/hsa:23533%09red/hsa:7454%09red/hsa:1794%09red/hsa:5294%09red/hsa:3635%09red/hsa:2212%09red/hsa:2214%09red/hsa:7409%09red/hsa:6850%09red/hsa:653361%09red/hsa:3055%09red
HTLV-I infection	KEGG PATHWAY	hsa05166	29	261	0.0032021	0.0182277	ENSG00000242574|ENSG00000121281|ENSG00000223865|ENSG00000224557|ENSG00000237541|ENSG00000204287|ENSG00000232810|ENSG00000118513|ENSG00000163513|ENSG00000160255|ENSG00000101017|ENSG00000125084|ENSG00000141506|ENSG00000226979|ENSG00000136244|ENSG00000090339|ENSG00000162772|ENSG00000241106|ENSG00000066336|ENSG00000122877|ENSG00000115590|ENSG00000115594|ENSG00000129467|ENSG00000105851|ENSG00000204257…	hsa:3109|hsa:113|hsa:3115|hsa:3115|hsa:3118|hsa:3122|hsa:7124|hsa:4602|hsa:7048|hsa:3689|hsa:958|hsa:7471|hsa:23533|hsa:4049|hsa:3569|hsa:3383|hsa:467|hsa:3112|hsa:6688|hsa:1959|hsa:7850|hsa:3554|hsa:196883|hsa:5294|hsa:3108|hsa:3117|hsa:4773|hsa:2114|hsa:7476|	3109|113|3115|3115|3118|3122|7124|4602|7048|3689|958|7471|23533|4049|3569|3383|467|3112|6688|1959|7850|3554|196883|5294|3108|3117|4773|2114|7476|	http://www.genome.jp/kegg-bin/show_pathway?hsa05166/hsa:3569%09red/hsa:3383%09red/hsa:467%09red/hsa:4049%09red/hsa:7476%09red/hsa:7471%09red/hsa:7124%09red/hsa:4773%09red/hsa:6688%09red/hsa:3109%09red/hsa:1959%09red/hsa:7850%09red/hsa:3108%09red/hsa:3554%09red/hsa:196883%09red/hsa:5294%09red/hsa:3122%09red/hsa:3689%09red/hsa:23533%09red/hsa:2114%09red/hsa:958%09red/hsa:113%09red/hsa:4602%09red/hs…
Natural killer cell mediated cytotoxicity	KEGG PATHWAY	hsa04650	18	134	0.00321893	0.0182277	ENSG00000126264|ENSG00000121858|ENSG00000105851|ENSG00000165025|ENSG00000160255|ENSG00000203747|ENSG00000043462|ENSG00000141506|ENSG00000117091|ENSG00000166501|ENSG00000122223|ENSG00000101096|ENSG00000090339|ENSG00000232810|ENSG00000158869|ENSG00000141968|ENSG00000011600|ENSG00000228863	hsa:10870|hsa:8743|hsa:5294|hsa:6850|hsa:3689|hsa:2214|hsa:3937|hsa:23533|hsa:962|hsa:5579|hsa:51744|hsa:4773|hsa:3383|hsa:7124|hsa:2207|hsa:7409|hsa:7305|hsa:962|	10870|8743|5294|6850|3689|2214|3937|23533|962|5579|51744|4773|3383|7124|2207|7409|7305|962|	http://www.genome.jp/kegg-bin/show_pathway?hsa04650/hsa:5579%09red/hsa:3689%09red/hsa:23533%09red/hsa:3383%09red/hsa:7124%09red/hsa:962%09red/hsa:10870%09red/hsa:5294%09red/hsa:51744%09red/hsa:4773%09red/hsa:3937%09red/hsa:7305%09red/hsa:7409%09red/hsa:6850%09red/hsa:2207%09red/hsa:8743%09red/hsa:2214%09red
Cell adhesion molecules (CAMs)	KEGG PATHWAY	hsa04514	19	145	0.00322206	0.0182277	ENSG00000090339|ENSG00000169896|ENSG00000237541|ENSG00000101017|ENSG00000114013|ENSG00000197471|ENSG00000242574|ENSG00000160255|ENSG00000223865|ENSG00000010610|ENSG00000196735|ENSG00000241106|ENSG00000198910|ENSG00000224557|ENSG00000160223|ENSG00000261371|ENSG00000204287|ENSG00000204257|ENSG00000277117	hsa:3383|hsa:3684|hsa:3118|hsa:958|hsa:942|hsa:6693|hsa:3109|hsa:3689|hsa:3115|hsa:920|hsa:3117|hsa:3112|hsa:3897|hsa:3115|hsa:23308|hsa:5175|hsa:3122|hsa:3108|hsa:23308|	3383|3684|3118|958|942|6693|3109|3689|3115|920|3117|3112|3897|3115|23308|5175|3122|3108|23308|	http://www.genome.jp/kegg-bin/show_pathway?hsa04514/hsa:3689%09red/hsa:3897%09red/hsa:3117%09red/hsa:942%09red/hsa:3383%09red/hsa:6693%09red/hsa:23308%09red/hsa:3684%09red/hsa:958%09red/hsa:920%09red/hsa:3112%09red/hsa:3115%09red/hsa:3108%09red/hsa:3109%09red/hsa:5175%09red/hsa:3118%09red/hsa:3122%09red
Chagas disease (American trypanosomiasis)	KEGG PATHWAY	hsa05142	15	104	0.00379077	0.0208492	ENSG00000108691|ENSG00000060558|ENSG00000277632|ENSG00000105851|ENSG00000250771|ENSG00000169429|ENSG00000141506|ENSG00000137462|ENSG00000276085|ENSG00000125538|ENSG00000136244|ENSG00000136634|ENSG00000232810|ENSG00000137841|ENSG00000163513	hsa:6347|hsa:2769|hsa:6348|hsa:5294|hsa:7097|hsa:3576|hsa:23533|hsa:7097|hsa:414062|hsa:3553|hsa:3569|hsa:3586|hsa:7124|hsa:5330|hsa:7048|	6347|2769|6348|5294|7097|3576|23533|7097|414062|3553|3569|3586|7124|5330|7048|	http://www.genome.jp/kegg-bin/show_pathway?hsa05142/hsa:3569%09red/hsa:3553%09red/hsa:23533%09red/hsa:3586%09red/hsa:5330%09red/hsa:7124%09red/hsa:2769%09red/hsa:7097%09red/hsa:5294%09red/hsa:3576%09red/hsa:6347%09red/hsa:7048%09red/hsa:414062%09red/hsa:6348%09red
Antigen processing and presentation	KEGG PATHWAY	hsa04612	12	79	0.00635262	0.0339951	ENSG00000241106|ENSG00000216490|ENSG00000242574|ENSG00000223865|ENSG00000196735|ENSG00000010610|ENSG00000224557|ENSG00000237541|ENSG00000204287|ENSG00000232810|ENSG00000204257|ENSG00000163131	hsa:3112|hsa:10437|hsa:3109|hsa:3115|hsa:3117|hsa:920|hsa:3115|hsa:3118|hsa:3122|hsa:7124|hsa:3108|hsa:1520|	3112|10437|3109|3115|3117|920|3115|3118|3122|7124|3108|1520|	http://www.genome.jp/kegg-bin/show_pathway?hsa04612/hsa:10437%09red/hsa:3117%09red/hsa:1520%09red/hsa:7124%09red/hsa:920%09red/hsa:3112%09red/hsa:3115%09red/hsa:3108%09red/hsa:3109%09red/hsa:3118%09red/hsa:3122%09red
Fc epsilon RI signaling pathway	KEGG PATHWAY	hsa04664	11	70	0.00705315	0.0367506	ENSG00000165025|ENSG00000105851|ENSG00000010671|ENSG00000043462|ENSG00000141506|ENSG00000179639|ENSG00000166501|ENSG00000232810|ENSG00000158869|ENSG00000141968|ENSG00000168918	hsa:6850|hsa:5294|hsa:695|hsa:3937|hsa:23533|hsa:2205|hsa:5579|hsa:7124|hsa:2207|hsa:7409|hsa:3635|	6850|5294|695|3937|23533|2205|5579|7124|2207|7409|3635|	http://www.genome.jp/kegg-bin/show_pathway?hsa04664/hsa:5579%09red/hsa:695%09red/hsa:23533%09red/hsa:7124%09red/hsa:5294%09red/hsa:3635%09red/hsa:3937%09red/hsa:7409%09red/hsa:6850%09red/hsa:2207%09red/hsa:2205%09red
Pertussis	KEGG PATHWAY	hsa05133	11	75	0.0109512	0.0555982	ENSG00000169896|ENSG00000169429|ENSG00000160255|ENSG00000154589|ENSG00000162711|ENSG00000125538|ENSG00000137752|ENSG00000136244|ENSG00000136634|ENSG00000232810|ENSG00000170458	hsa:3684|hsa:3576|hsa:3689|hsa:23643|hsa:114548|hsa:3553|hsa:834|hsa:3569|hsa:3586|hsa:7124|hsa:929|	3684|3576|3689|23643|114548|3553|834|3569|3586|7124|929|	http://www.genome.jp/kegg-bin/show_pathway?hsa05133/hsa:834%09red/hsa:3569%09red/hsa:3553%09red/hsa:114548%09red/hsa:3586%09red/hsa:3576%09red/hsa:7124%09red/hsa:3689%09red/hsa:3684%09red/hsa:23643%09red/hsa:929%09red
Herpes simplex infection	KEGG PATHWAY	hsa05168	20	186	0.0172145	0.0852117	ENSG00000126759|ENSG00000204257|ENSG00000250771|ENSG00000108691|ENSG00000241106|ENSG00000223865|ENSG00000242574|ENSG00000196735|ENSG00000184557|ENSG00000137462|ENSG00000229715|ENSG00000125735|ENSG00000224557|ENSG00000226979|ENSG00000237541|ENSG00000125538|ENSG00000204287|ENSG00000136244|ENSG00000085514|ENSG00000232810	hsa:5199|hsa:3108|hsa:7097|hsa:6347|hsa:3112|hsa:3115|hsa:3109|hsa:3117|hsa:9021|hsa:7097|hsa:1936|hsa:8740|hsa:3115|hsa:4049|hsa:3118|hsa:3553|hsa:3122|hsa:3569|hsa:29992|hsa:7124|	5199|3108|7097|6347|3112|3115|3109|3117|9021|7097|1936|8740|3115|4049|3118|3553|3122|3569|29992|7124|	http://www.genome.jp/kegg-bin/show_pathway?hsa05168/hsa:3569%09red/hsa:3553%09red/hsa:1936%09red/hsa:3117%09red/hsa:7097%09red/hsa:7124%09red/hsa:8740%09red/hsa:6347%09red/hsa:29992%09red/hsa:3112%09red/hsa:3115%09red/hsa:3108%09red/hsa:3109%09red/hsa:3118%09red/hsa:5199%09red/hsa:4049%09red/hsa:3122%09red/hsa:9021%09red
Transcriptional misregulation in cancer	KEGG PATHWAY	hsa05202	19	179	0.0221531	0.106983	ENSG00000135363|ENSG00000239839|ENSG00000169896|ENSG00000163513|ENSG00000245848|ENSG00000114013|ENSG00000066336|ENSG00000169429|ENSG00000122025|ENSG00000198400|ENSG00000122861|ENSG00000140379|ENSG00000115590|ENSG00000100985|ENSG00000136244|ENSG00000005381|ENSG00000101017|ENSG00000170458|ENSG00000144802	hsa:4005|hsa:1668|hsa:3684|hsa:7048|hsa:1050|hsa:942|hsa:6688|hsa:3576|hsa:2322|hsa:4914|hsa:5328|hsa:597|hsa:7850|hsa:4318|hsa:3569|hsa:4353|hsa:958|hsa:929|hsa:64332|	4005|1668|3684|7048|1050|942|6688|3576|2322|4914|5328|597|7850|4318|3569|4353|958|929|64332|	http://www.genome.jp/kegg-bin/show_pathway?hsa05202/hsa:4914%09red/hsa:3569%09red/hsa:4318%09red/hsa:4005%09red/hsa:942%09red/hsa:597%09red/hsa:64332%09red/hsa:2322%09red/hsa:5328%09red/hsa:3684%09red/hsa:1050%09red/hsa:3576%09red/hsa:958%09red/hsa:1668%09red/hsa:6688%09red/hsa:929%09red/hsa:7850%09red/hsa:4353%09red/hsa:7048%09red
Systemic lupus erythematosus	KEGG PATHWAY	hsa05322	14	136	0.0543411	0.256179	ENSG00000101017|ENSG00000114013|ENSG00000203747|ENSG00000242574|ENSG00000223865|ENSG00000196735|ENSG00000241106|ENSG00000143226|ENSG00000224557|ENSG00000237541|ENSG00000204287|ENSG00000232810|ENSG00000136634|ENSG00000204257	hsa:958|hsa:942|hsa:2214|hsa:3109|hsa:3115|hsa:3117|hsa:3112|hsa:2212|hsa:3115|hsa:3118|hsa:3122|hsa:7124|hsa:3586|hsa:3108|	958|942|2214|3109|3115|3117|3112|2212|3115|3118|3122|7124|3586|3108|	http://www.genome.jp/kegg-bin/show_pathway?hsa05322/hsa:2212%09red/hsa:3586%09red/hsa:3117%09red/hsa:942%09red/hsa:7124%09red/hsa:958%09red/hsa:3112%09red/hsa:3115%09red/hsa:2214%09red/hsa:3108%09red/hsa:3109%09red/hsa:3118%09red/hsa:3122%09red
Carbohydrate digestion and absorption	KEGG PATHWAY	hsa04973	6	45	0.0740757	0.341093	ENSG00000160883|ENSG00000257335|ENSG00000105851|ENSG00000141506|ENSG00000166501|ENSG00000137841	hsa:3101|hsa:8972|hsa:5294|hsa:23533|hsa:5579|hsa:5330|	3101|8972|5294|23533|5579|5330|	http://www.genome.jp/kegg-bin/show_pathway?hsa04973/hsa:5579%09red/hsa:23533%09red/hsa:5330%09red/hsa:8972%09red/hsa:5294%09red/hsa:3101%09red
Complement and coagulation cascades	KEGG PATHWAY	hsa04610	8	69	0.0780505	0.351227	ENSG00000011422|ENSG00000203710|ENSG00000197766|ENSG00000122861|ENSG00000197249|ENSG00000197405|ENSG00000171860|ENSG00000178726	hsa:5329|hsa:1378|hsa:1675|hsa:5328|hsa:5265|hsa:728|hsa:719|hsa:7056|	5329|1378|1675|5328|5265|728|719|7056|	http://www.genome.jp/kegg-bin/show_pathway?hsa04610/hsa:5265%09red/hsa:1378%09red/hsa:5328%09red/hsa:5329%09red/hsa:719%09red/hsa:7056%09red/hsa:728%09red/hsa:1675%09red
Primary immunodeficiency	KEGG PATHWAY	hsa05340	5	36	0.0874611	0.384829	ENSG00000196839|ENSG00000010610|ENSG00000095585|ENSG00000010671|ENSG00000101017	hsa:100|hsa:920|hsa:29760|hsa:695|hsa:958|	100|920|29760|695|958|	http://www.genome.jp/kegg-bin/show_pathway?hsa05340/hsa:100%09red/hsa:695%09red/hsa:920%09red/hsa:29760%09red/hsa:958%09red
Inflammatory mediator regulation of TRP channels	KEGG PATHWAY	hsa04750	10	99	0.101944	0.438804	ENSG00000129467|ENSG00000105851|ENSG00000141506|ENSG00000198400|ENSG00000125538|ENSG00000166501|ENSG00000121281|ENSG00000171522|ENSG00000115594|ENSG00000137841	hsa:196883|hsa:5294|hsa:23533|hsa:4914|hsa:3553|hsa:5579|hsa:113|hsa:5734|hsa:3554|hsa:5330|	196883|5294|23533|4914|3553|5579|113|5734|3554|5330|	http://www.genome.jp/kegg-bin/show_pathway?hsa04750/hsa:5579%09red/hsa:4914%09red/hsa:3553%09red/hsa:23533%09red/hsa:3554%09red/hsa:5330%09red/hsa:5294%09red/hsa:113%09red/hsa:196883%09red/hsa:5734%09red
Cytosolic DNA-sensing pathway	KEGG PATHWAY	hsa04623	7	64	0.117627	0.495535	ENSG00000275302|ENSG00000129465|ENSG00000150782|ENSG00000125538|ENSG00000137752|ENSG00000136244|ENSG00000276070	hsa:6351|hsa:11035|hsa:3606|hsa:3553|hsa:834|hsa:3569|hsa:6351|	6351|11035|3606|3553|834|3569|6351|	http://www.genome.jp/kegg-bin/show_pathway?hsa04623/hsa:834%09red/hsa:3569%09red/hsa:3553%09red/hsa:3606%09red/hsa:11035%09red/hsa:6351%09red
Epstein-Barr virus infection	KEGG PATHWAY	hsa05169	17	202	0.137871	0.568719	ENSG00000000938|ENSG00000026508|ENSG00000105851|ENSG00000101017|ENSG00000197471|ENSG00000138185|ENSG00000165025|ENSG00000223865|ENSG00000141506|ENSG00000196735|ENSG00000224557|ENSG00000110324|ENSG00000237541|ENSG00000204287|ENSG00000090339|ENSG00000136634|ENSG00000066336	hsa:2268|hsa:960|hsa:5294|hsa:958|hsa:6693|hsa:953|hsa:6850|hsa:3115|hsa:23533|hsa:3117|hsa:3115|hsa:3587|hsa:3118|hsa:3122|hsa:3383|hsa:3586|hsa:6688|	2268|960|5294|958|6693|953|6850|3115|23533|3117|3115|3587|3118|3122|3383|3586|6688|	http://www.genome.jp/kegg-bin/show_pathway?hsa05169/hsa:23533%09red/hsa:953%09red/hsa:3117%09red/hsa:3383%09red/hsa:6850%09red/hsa:5294%09red/hsa:960%09red/hsa:958%09red/hsa:6693%09red/hsa:3115%09red/hsa:6688%09red/hsa:3118%09red/hsa:3586%09red/hsa:3122%09red/hsa:2268%09red/hsa:3587%09red
Apoptosis	KEGG PATHWAY	hsa04210	8	86	0.17982	0.72662	ENSG00000100368|ENSG00000121858|ENSG00000105851|ENSG00000141506|ENSG00000198400|ENSG00000125538|ENSG00000232810|ENSG00000115594	hsa:1439|hsa:8743|hsa:5294|hsa:23533|hsa:4914|hsa:3553|hsa:7124|hsa:3554|	1439|8743|5294|23533|4914|3553|7124|3554|	http://www.genome.jp/kegg-bin/show_pathway?hsa04210/hsa:4914%09red/hsa:3553%09red/hsa:23533%09red/hsa:3554%09red/hsa:7124%09red/hsa:1439%09red/hsa:5294%09red/hsa:8743%09red
Type II diabetes mellitus	KEGG PATHWAY	hsa04930	5	48	0.19329	0.765427	ENSG00000160883|ENSG00000184557|ENSG00000232810|ENSG00000105851|ENSG00000141506	hsa:3101|hsa:9021|hsa:7124|hsa:5294|hsa:23533|	3101|9021|7124|5294|23533|	http://www.genome.jp/kegg-bin/show_pathway?hsa04930/hsa:7124%09red/hsa:23533%09red/hsa:5294%09red/hsa:9021%09red/hsa:3101%09red
Salivary secretion	KEGG PATHWAY	hsa04970	8	90	0.209679	0.814047	ENSG00000129467|ENSG00000164047|ENSG00000169252|ENSG00000166501|ENSG00000121281|ENSG00000090382|ENSG00000137841|ENSG00000104783	hsa:196883|hsa:820|hsa:154|hsa:5579|hsa:113|hsa:4069|hsa:5330|hsa:3783|	196883|820|154|5579|113|4069|5330|3783|	http://www.genome.jp/kegg-bin/show_pathway?hsa04970/hsa:5579%09red/hsa:820%09red/hsa:154%09red/hsa:113%09red/hsa:3783%09red/hsa:4069%09red/hsa:5330%09red/hsa:196883%09red
Jak-STAT signaling pathway	KEGG PATHWAY	hsa04630	12	156	0.271907	1	ENSG00000100368|ENSG00000141506|ENSG00000105851|ENSG00000205755|ENSG00000184557|ENSG00000160712|ENSG00000198223|ENSG00000110324|ENSG00000119535|ENSG00000099985|ENSG00000136244|ENSG00000136634	hsa:1439|hsa:23533|hsa:5294|hsa:64109|hsa:9021|hsa:3570|hsa:1438|hsa:3587|hsa:1441|hsa:5008|hsa:3569|hsa:3586|	1439|23533|5294|64109|9021|3570|1438|3587|1441|5008|3569|3586|	http://www.genome.jp/kegg-bin/show_pathway?hsa04630/hsa:3569%09red/hsa:23533%09red/hsa:3586%09red/hsa:3587%09red/hsa:1438%09red/hsa:1439%09red/hsa:3570%09red/hsa:5294%09red/hsa:64109%09red/hsa:1441%09red/hsa:5008%09red/hsa:9021%09red
Acute myeloid leukemia	KEGG PATHWAY	hsa05221	5	57	0.29164	1	ENSG00000122025|ENSG00000066336|ENSG00000105851|ENSG00000141506|ENSG00000245848	hsa:2322|hsa:6688|hsa:5294|hsa:23533|hsa:1050|	2322|6688|5294|23533|1050|	http://www.genome.jp/kegg-bin/show_pathway?hsa05221/hsa:23533%09red/hsa:5294%09red/hsa:6688%09red/hsa:1050%09red/hsa:2322%09red
Butirosin and neomycin biosynthesis	KEGG PATHWAY	hsa00524	1	5	0.301799	1	ENSG00000160883	hsa:3101|	3101|	http://www.genome.jp/kegg-bin/show_pathway?hsa00524/hsa:3101%09red
Phenylalanine, tyrosine and tryptophan biosynthesis	KEGG PATHWAY	hsa00400	1	5	0.301799	1	ENSG00000104951	hsa:259307|	259307|	http://www.genome.jp/kegg-bin/show_pathway?hsa00400/hsa:259307%09red
Pantothenate and CoA biosynthesis	KEGG PATHWAY	hsa00770	2	17	0.303545	1	ENSG00000112299|ENSG00000112303	hsa:8876|hsa:8875|	8876|8875|	http://www.genome.jp/kegg-bin/show_pathway?hsa00770/hsa:8876%09red/hsa:8875%09red
Hepatitis B	KEGG PATHWAY	hsa05161	11	146	0.305164	1	ENSG00000105851|ENSG00000250771|ENSG00000169429|ENSG00000141506|ENSG00000137462|ENSG00000101096|ENSG00000166501|ENSG00000122877|ENSG00000100985|ENSG00000136244|ENSG00000232810	hsa:5294|hsa:7097|hsa:3576|hsa:23533|hsa:7097|hsa:4773|hsa:5579|hsa:1959|hsa:4318|hsa:3569|hsa:7124|	5294|7097|3576|23533|7097|4773|5579|1959|4318|3569|7124|	http://www.genome.jp/kegg-bin/show_pathway?hsa05161/hsa:5579%09red/hsa:3569%09red/hsa:4318%09red/hsa:23533%09red/hsa:7097%09red/hsa:7124%09red/hsa:5294%09red/hsa:3576%09red/hsa:4773%09red/hsa:1959%09red
T cell receptor signaling pathway	KEGG PATHWAY	hsa04660	8	104	0.326072	1	ENSG00000105851|ENSG00000043462|ENSG00000141506|ENSG00000010610|ENSG00000101096|ENSG00000232810|ENSG00000136634|ENSG00000141968	hsa:5294|hsa:3937|hsa:23533|hsa:920|hsa:4773|hsa:7124|hsa:3586|hsa:7409|	5294|3937|23533|920|4773|7124|3586|7409|	http://www.genome.jp/kegg-bin/show_pathway?hsa04660/hsa:23533%09red/hsa:3586%09red/hsa:7124%09red/hsa:5294%09red/hsa:4773%09red/hsa:920%09red/hsa:3937%09red/hsa:7409%09red
Rap1 signaling pathway	KEGG PATHWAY	hsa04015	15	211	0.335353	1	ENSG00000129467|ENSG00000077420|ENSG00000043462|ENSG00000105851|ENSG00000169896|ENSG00000184574|ENSG00000121281|ENSG00000198121|ENSG00000233261|ENSG00000141506|ENSG00000166501|ENSG00000171051|ENSG00000082074|ENSG00000137841|ENSG00000160255	hsa:196883|hsa:54518|hsa:3937|hsa:5294|hsa:3684|hsa:57121|hsa:113|hsa:1902|hsa:54518|hsa:23533|hsa:5579|hsa:2357|hsa:2533|hsa:5330|hsa:3689|	196883|54518|3937|5294|3684|57121|113|1902|54518|23533|5579|2357|2533|5330|3689|	http://www.genome.jp/kegg-bin/show_pathway?hsa04015/hsa:5579%09red/hsa:3689%09red/hsa:23533%09red/hsa:5330%09red/hsa:54518%09red/hsa:2533%09red/hsa:5294%09red/hsa:3684%09red/hsa:1902%09red/hsa:113%09red/hsa:3937%09red/hsa:196883%09red/hsa:57121%09red/hsa:2357%09red
HIF-1 signaling pathway	KEGG PATHWAY	hsa04066	8	106	0.343686	1	ENSG00000160883|ENSG00000105851|ENSG00000165168|ENSG00000160712|ENSG00000129521|ENSG00000141506|ENSG00000166501|ENSG00000136244	hsa:3101|hsa:5294|hsa:1536|hsa:3570|hsa:112399|hsa:23533|hsa:5579|hsa:3569|	3101|5294|1536|3570|112399|23533|5579|3569|	http://www.genome.jp/kegg-bin/show_pathway?hsa04066/hsa:5579%09red/hsa:3569%09red/hsa:23533%09red/hsa:3570%09red/hsa:5294%09red/hsa:112399%09red/hsa:3101%09red/hsa:1536%09red
Morphine addiction	KEGG PATHWAY	hsa05032	7	93	0.362348	1	ENSG00000129467|ENSG00000167083|ENSG00000186642|ENSG00000166501|ENSG00000121281|ENSG00000141480|ENSG00000256633	hsa:196883|hsa:2793|hsa:5138|hsa:5579|hsa:113|hsa:409|hsa:5138|	196883|2793|5138|5579|113|409|5138|	http://www.genome.jp/kegg-bin/show_pathway?hsa05032/hsa:5579%09red/hsa:409%09red/hsa:5138%09red/hsa:2793%09red/hsa:113%09red/hsa:196883%09red
Phosphatidylinositol signaling system	KEGG PATHWAY	hsa04070	6	81	0.394059	1	ENSG00000105851|ENSG00000141506|ENSG00000166501|ENSG00000168918|ENSG00000137841|ENSG00000109452	hsa:5294|hsa:23533|hsa:5579|hsa:3635|hsa:5330|hsa:8821|	5294|23533|5579|3635|5330|8821|	http://www.genome.jp/kegg-bin/show_pathway?hsa04070/hsa:5579%09red/hsa:23533%09red/hsa:5330%09red/hsa:5294%09red/hsa:8821%09red/hsa:3635%09red
Prion diseases	KEGG PATHWAY	hsa05020	3	36	0.397147	1	ENSG00000125538|ENSG00000136244|ENSG00000148400	hsa:3553|hsa:3569|hsa:4851|	3553|3569|4851|	http://www.genome.jp/kegg-bin/show_pathway?hsa05020/hsa:3569%09red/hsa:3553%09red/hsa:4851%09red
Bladder cancer	KEGG PATHWAY	hsa05219	3	38	0.428779	1	ENSG00000025708|ENSG00000100985|ENSG00000169429	hsa:1890|hsa:4318|hsa:3576|	1890|4318|3576|	http://www.genome.jp/kegg-bin/show_pathway?hsa05219/hsa:4318%09red/hsa:1890%09red/hsa:3576%09red
Estrogen signaling pathway	KEGG PATHWAY	hsa04915	7	100	0.429728	1	ENSG00000129467|ENSG00000105851|ENSG00000141506|ENSG00000113070|ENSG00000121281|ENSG00000100985|ENSG00000137841	hsa:196883|hsa:5294|hsa:23533|hsa:1839|hsa:113|hsa:4318|hsa:5330|	196883|5294|23533|1839|113|4318|5330|	http://www.genome.jp/kegg-bin/show_pathway?hsa04915/hsa:4318%09red/hsa:23533%09red/hsa:1839%09red/hsa:5330%09red/hsa:5294%09red/hsa:113%09red/hsa:196883%09red
Aldosterone-regulated sodium reabsorption	KEGG PATHWAY	hsa04960	3	39	0.444374	1	ENSG00000105851|ENSG00000166501|ENSG00000141506	hsa:5294|hsa:5579|hsa:23533|	5294|5579|23533|	http://www.genome.jp/kegg-bin/show_pathway?hsa04960/hsa:5579%09red/hsa:23533%09red/hsa:5294%09red
Dorso-ventral axis formation	KEGG PATHWAY	hsa04320	2	24	0.450987	1	ENSG00000157557|ENSG00000148400	hsa:2114|hsa:4851|	2114|4851|	http://www.genome.jp/kegg-bin/show_pathway?hsa04320/hsa:4851%09red/hsa:2114%09red
FoxO signaling pathway	KEGG PATHWAY	hsa04068	9	134	0.452003	1	ENSG00000121858|ENSG00000105851|ENSG00000176165|ENSG00000141506|ENSG00000170989|ENSG00000099860|ENSG00000136244|ENSG00000136634|ENSG00000163513	hsa:8743|hsa:5294|hsa:2290|hsa:23533|hsa:1901|hsa:4616|hsa:3569|hsa:3586|hsa:7048|	8743|5294|2290|23533|1901|4616|3569|3586|7048|	http://www.genome.jp/kegg-bin/show_pathway?hsa04068/hsa:3569%09red/hsa:23533%09red/hsa:3586%09red/hsa:5294%09red/hsa:1901%09red/hsa:4616%09red/hsa:2290%09red/hsa:8743%09red/hsa:7048%09red
Thyroid hormone synthesis	KEGG PATHWAY	hsa04918	5	72	0.465883	1	ENSG00000129467|ENSG00000121281|ENSG00000166501|ENSG00000137841|ENSG00000161944	hsa:196883|hsa:113|hsa:5579|hsa:5330|hsa:433|	196883|113|5579|5330|433|	http://www.genome.jp/kegg-bin/show_pathway?hsa04918/hsa:5579%09red/hsa:113%09red/hsa:433%09red/hsa:5330%09red/hsa:196883%09red
Prolactin signaling pathway	KEGG PATHWAY	hsa04917	5	72	0.465883	1	ENSG00000184557|ENSG00000141655|ENSG00000120659|ENSG00000105851|ENSG00000141506	hsa:9021|hsa:8792|hsa:8600|hsa:5294|hsa:23533|	9021|8792|8600|5294|23533|	http://www.genome.jp/kegg-bin/show_pathway?hsa04917/hsa:8792%09red/hsa:8600%09red/hsa:23533%09red/hsa:5294%09red/hsa:9021%09red
Sulfur metabolism	KEGG PATHWAY	hsa00920	1	10	0.48247	1	ENSG00000137767	hsa:58472|	58472|	http://www.genome.jp/kegg-bin/show_pathway?hsa00920/hsa:58472%09red
Proteoglycans in cancer	KEGG PATHWAY	hsa05205	13	204	0.495805	1	ENSG00000026508|ENSG00000011422|ENSG00000105851|ENSG00000250771|ENSG00000125084|ENSG00000141506|ENSG00000137462|ENSG00000113070|ENSG00000122861|ENSG00000166501|ENSG00000100985|ENSG00000232810|ENSG00000154764	hsa:960|hsa:5329|hsa:5294|hsa:7097|hsa:7471|hsa:23533|hsa:7097|hsa:1839|hsa:5328|hsa:5579|hsa:4318|hsa:7124|hsa:7476|	960|5329|5294|7097|7471|23533|7097|1839|5328|5579|4318|7124|7476|	http://www.genome.jp/kegg-bin/show_pathway?hsa05205/hsa:5579%09red/hsa:7476%09red/hsa:4318%09red/hsa:23533%09red/hsa:1839%09red/hsa:7097%09red/hsa:7124%09red/hsa:5294%09red/hsa:7471%09red/hsa:5328%09red/hsa:5329%09red/hsa:960%09red
Gastric acid secretion	KEGG PATHWAY	hsa04971	5	75	0.499709	1	ENSG00000129467|ENSG00000157551|ENSG00000166501|ENSG00000137841|ENSG00000121281	hsa:196883|hsa:3772|hsa:5579|hsa:5330|hsa:113|	196883|3772|5579|5330|113|	http://www.genome.jp/kegg-bin/show_pathway?hsa04971/hsa:5579%09red/hsa:113%09red/hsa:3772%09red/hsa:5330%09red/hsa:196883%09red
mTOR signaling pathway	KEGG PATHWAY	hsa04150	4	60	0.514495	1	ENSG00000232810|ENSG00000105851|ENSG00000166501|ENSG00000141506	hsa:7124|hsa:5294|hsa:5579|hsa:23533|	7124|5294|5579|23533|	http://www.genome.jp/kegg-bin/show_pathway?hsa04150/hsa:5579%09red/hsa:7124%09red/hsa:23533%09red/hsa:5294%09red
Inositol phosphate metabolism	KEGG PATHWAY	hsa00562	4	61	0.526836	1	ENSG00000105851|ENSG00000168918|ENSG00000137841|ENSG00000109452	hsa:5294|hsa:3635|hsa:5330|hsa:8821|	5294|3635|5330|8821|	http://www.genome.jp/kegg-bin/show_pathway?hsa00562/hsa:8821%09red/hsa:5294%09red/hsa:3635%09red/hsa:5330%09red
VEGF signaling pathway	KEGG PATHWAY	hsa04370	4	61	0.526836	1	ENSG00000101096|ENSG00000105851|ENSG00000166501|ENSG00000141506	hsa:4773|hsa:5294|hsa:5579|hsa:23533|	4773|5294|5579|23533|	http://www.genome.jp/kegg-bin/show_pathway?hsa04370/hsa:5579%09red/hsa:23533%09red/hsa:5294%09red/hsa:4773%09red
Riboflavin metabolism	KEGG PATHWAY	hsa00740	1	12	0.540897	1	ENSG00000102575	hsa:54|	54|	http://www.genome.jp/kegg-bin/show_pathway?hsa00740/hsa:54%09red
Cholinergic synapse	KEGG PATHWAY	hsa04725	7	113	0.551025	1	ENSG00000129467|ENSG00000105851|ENSG00000141506|ENSG00000166501|ENSG00000121281|ENSG00000137841|ENSG00000167083	hsa:196883|hsa:5294|hsa:23533|hsa:5579|hsa:113|hsa:5330|hsa:2793|	196883|5294|23533|5579|113|5330|2793|	http://www.genome.jp/kegg-bin/show_pathway?hsa04725/hsa:5579%09red/hsa:23533%09red/hsa:5330%09red/hsa:2793%09red/hsa:5294%09red/hsa:113%09red/hsa:196883%09red
Circadian entrainment	KEGG PATHWAY	hsa04713	6	97	0.557067	1	ENSG00000129467|ENSG00000167083|ENSG00000121281|ENSG00000196557|ENSG00000137841|ENSG00000166501	hsa:196883|hsa:2793|hsa:113|hsa:8912|hsa:5330|hsa:5579|	196883|2793|113|8912|5330|5579|	http://www.genome.jp/kegg-bin/show_pathway?hsa04713/hsa:5579%09red/hsa:5330%09red/hsa:2793%09red/hsa:113%09red/hsa:196883%09red/hsa:8912%09red
Endocrine and other factor-regulated calcium reabsorption	KEGG PATHWAY	hsa04961	3	48	0.575391	1	ENSG00000111424|ENSG00000166501|ENSG00000137841	hsa:7421|hsa:5579|hsa:5330|	7421|5579|5330|	http://www.genome.jp/kegg-bin/show_pathway?hsa04961/hsa:5579%09red/hsa:7421%09red/hsa:5330%09red
Notch signaling pathway	KEGG PATHWAY	hsa04330	3	48	0.575391	1	ENSG00000106003|ENSG00000148400|ENSG00000100060	hsa:3955|hsa:4851|hsa:4242|	3955|4851|4242|	http://www.genome.jp/kegg-bin/show_pathway?hsa04330/hsa:3955%09red/hsa:4242%09red/hsa:4851%09red
Circadian rhythm	KEGG PATHWAY	hsa04710	2	31	0.579162	1	ENSG00000143365|ENSG00000123095	hsa:6097|hsa:79365|	6097|79365|	http://www.genome.jp/kegg-bin/show_pathway?hsa04710/hsa:6097%09red/hsa:79365%09red
Galactose metabolism	KEGG PATHWAY	hsa00052	2	31	0.579162	1	ENSG00000160883|ENSG00000257335	hsa:3101|hsa:8972|	3101|8972|	http://www.genome.jp/kegg-bin/show_pathway?hsa00052/hsa:8972%09red/hsa:3101%09red
Other types of O-glycan biosynthesis	KEGG PATHWAY	hsa00514	2	31	0.579162	1	ENSG00000106003|ENSG00000100060	hsa:3955|hsa:4242|	3955|4242|	http://www.genome.jp/kegg-bin/show_pathway?hsa00514/hsa:3955%09red/hsa:4242%09red
cGMP-PKG signaling pathway	KEGG PATHWAY	hsa04022	10	167	0.582496	1	ENSG00000129467|ENSG00000105851|ENSG00000141506|ENSG00000186642|ENSG00000169252|ENSG00000121281|ENSG00000101096|ENSG00000282608|ENSG00000137841|ENSG00000256633	hsa:196883|hsa:5294|hsa:23533|hsa:5138|hsa:154|hsa:113|hsa:4773|hsa:140|hsa:5330|hsa:5138|	196883|5294|23533|5138|154|113|4773|140|5330|5138|	http://www.genome.jp/kegg-bin/show_pathway?hsa04022/hsa:23533%09red/hsa:5330%09red/hsa:5138%09red/hsa:154%09red/hsa:5294%09red/hsa:4773%09red/hsa:113%09red/hsa:140%09red/hsa:196883%09red
Measles	KEGG PATHWAY	hsa05162	8	134	0.587147	1	ENSG00000121858|ENSG00000105851|ENSG00000250771|ENSG00000141506|ENSG00000137462|ENSG00000125538|ENSG00000136244|ENSG00000196664	hsa:8743|hsa:5294|hsa:7097|hsa:23533|hsa:7097|hsa:3553|hsa:3569|hsa:51284|	8743|5294|7097|23533|7097|3553|3569|51284|	http://www.genome.jp/kegg-bin/show_pathway?hsa05162/hsa:3569%09red/hsa:3553%09red/hsa:23533%09red/hsa:7097%09red/hsa:5294%09red/hsa:51284%09red/hsa:8743%09red
Non-alcoholic fatty liver disease (NAFLD)	KEGG PATHWAY	hsa04932	9	151	0.588362	1	ENSG00000105851|ENSG00000245848|ENSG00000169429|ENSG00000184557|ENSG00000160712|ENSG00000141506|ENSG00000125538|ENSG00000136244|ENSG00000232810	hsa:5294|hsa:1050|hsa:3576|hsa:9021|hsa:3570|hsa:23533|hsa:3553|hsa:3569|hsa:7124|	5294|1050|3576|9021|3570|23533|3553|3569|7124|	http://www.genome.jp/kegg-bin/show_pathway?hsa04932/hsa:3569%09red/hsa:3553%09red/hsa:23533%09red/hsa:7124%09red/hsa:3570%09red/hsa:5294%09red/hsa:3576%09red/hsa:1050%09red/hsa:9021%09red
Melanogenesis	KEGG PATHWAY	hsa04916	6	101	0.594702	1	ENSG00000129467|ENSG00000125084|ENSG00000166501|ENSG00000121281|ENSG00000154764|ENSG00000137841	hsa:196883|hsa:7471|hsa:5579|hsa:113|hsa:7476|hsa:5330|	196883|7471|5579|113|7476|5330|	http://www.genome.jp/kegg-bin/show_pathway?hsa04916/hsa:5579%09red/hsa:7476%09red/hsa:5330%09red/hsa:7471%09red/hsa:113%09red/hsa:196883%09red
Amyotrophic lateral sclerosis (ALS)	KEGG PATHWAY	hsa05014	3	51	0.614549	1	ENSG00000137752|ENSG00000232810|ENSG00000028137	hsa:834|hsa:7124|hsa:7133|	834|7124|7133|	http://www.genome.jp/kegg-bin/show_pathway?hsa05014/hsa:7124%09red/hsa:834%09red/hsa:7133%09red
Insulin secretion	KEGG PATHWAY	hsa04911	5	86	0.615276	1	ENSG00000129467|ENSG00000104783|ENSG00000166501|ENSG00000137841|ENSG00000121281	hsa:196883|hsa:3783|hsa:5579|hsa:5330|hsa:113|	196883|3783|5579|5330|113|	http://www.genome.jp/kegg-bin/show_pathway?hsa04911/hsa:5579%09red/hsa:113%09red/hsa:5330%09red/hsa:3783%09red/hsa:196883%09red
Neuroactive ligand-receptor interaction	KEGG PATHWAY	hsa04080	16	275	0.626667	1	ENSG00000198121|ENSG00000171631|ENSG00000282608|ENSG00000213903|ENSG00000174944|ENSG00000171860|ENSG00000171049|ENSG00000160013|ENSG00000170989|ENSG00000169252|ENSG00000197405|ENSG00000171051|ENSG00000171522|ENSG00000169403|ENSG00000122420|ENSG00000187474	hsa:1902|hsa:5031|hsa:140|hsa:1241|hsa:9934|hsa:719|hsa:2358|hsa:5739|hsa:1901|hsa:154|hsa:728|hsa:2357|hsa:5734|hsa:5724|hsa:5737|hsa:2359|	1902|5031|140|1241|9934|719|2358|5739|1901|154|728|2357|5734|5724|5737|2359|	http://www.genome.jp/kegg-bin/show_pathway?hsa04080/hsa:2358%09red/hsa:2359%09red/hsa:5031%09red/hsa:154%09red/hsa:140%09red/hsa:1901%09red/hsa:1902%09red/hsa:5724%09red/hsa:719%09red/hsa:5739%09red/hsa:1241%09red/hsa:728%09red/hsa:9934%09red/hsa:5734%09red/hsa:5737%09red/hsa:2357%09red
Tyrosine metabolism	KEGG PATHWAY	hsa00350	2	35	0.641925	1	ENSG00000141744|ENSG00000104951	hsa:5409|hsa:259307|	5409|259307|	http://www.genome.jp/kegg-bin/show_pathway?hsa00350/hsa:259307%09red/hsa:5409%09red
Gap junction	KEGG PATHWAY	hsa04540	5	89	0.643938	1	ENSG00000129467|ENSG00000198121|ENSG00000166501|ENSG00000137841|ENSG00000121281	hsa:196883|hsa:1902|hsa:5579|hsa:5330|hsa:113|	196883|1902|5579|5330|113|	http://www.genome.jp/kegg-bin/show_pathway?hsa04540/hsa:5579%09red/hsa:113%09red/hsa:5330%09red/hsa:1902%09red/hsa:196883%09red
Pathogenic Escherichia coli infection	KEGG PATHWAY	hsa05130	3	55	0.662842	1	ENSG00000154589|ENSG00000015285|ENSG00000170458	hsa:23643|hsa:7454|hsa:929|	23643|7454|929|	http://www.genome.jp/kegg-bin/show_pathway?hsa05130/hsa:929%09red/hsa:7454%09red/hsa:23643%09red
GnRH signaling pathway	KEGG PATHWAY	hsa04912	5	92	0.671226	1	ENSG00000113070|ENSG00000129467|ENSG00000166501|ENSG00000137841|ENSG00000121281	hsa:1839|hsa:196883|hsa:5579|hsa:5330|hsa:113|	1839|196883|5579|5330|113|	http://www.genome.jp/kegg-bin/show_pathway?hsa04912/hsa:5579%09red/hsa:113%09red/hsa:5330%09red/hsa:1839%09red/hsa:196883%09red
Non-small cell lung cancer	KEGG PATHWAY	hsa05223	3	56	0.674204	1	ENSG00000105851|ENSG00000166501|ENSG00000141506	hsa:5294|hsa:5579|hsa:23533|	5294|5579|23533|	http://www.genome.jp/kegg-bin/show_pathway?hsa05223/hsa:5579%09red/hsa:23533%09red/hsa:5294%09red
Phenylalanine metabolism	KEGG PATHWAY	hsa00360	1	18	0.679514	1	ENSG00000104951	hsa:259307|	259307|	http://www.genome.jp/kegg-bin/show_pathway?hsa00360/hsa:259307%09red
Tryptophan metabolism	KEGG PATHWAY	hsa00380	2	40	0.709696	1	ENSG00000115919|ENSG00000104951	hsa:8942|hsa:259307|	8942|259307|	http://www.genome.jp/kegg-bin/show_pathway?hsa00380/hsa:259307%09red/hsa:8942%09red
MAPK signaling pathway	KEGG PATHWAY	hsa04010	14	257	0.712808	1	ENSG00000171777|ENSG00000170458|ENSG00000232810|ENSG00000198400|ENSG00000166501|ENSG00000099860|ENSG00000158050|ENSG00000125538|ENSG00000115590|ENSG00000141480|ENSG00000120875|ENSG00000115594|ENSG00000163513|ENSG00000196557	hsa:115727|hsa:929|hsa:7124|hsa:4914|hsa:5579|hsa:4616|hsa:1844|hsa:3553|hsa:7850|hsa:409|hsa:1846|hsa:3554|hsa:7048|hsa:8912|	115727|929|7124|4914|5579|4616|1844|3553|7850|409|1846|3554|7048|8912|	http://www.genome.jp/kegg-bin/show_pathway?hsa04010/hsa:5579%09red/hsa:4914%09red/hsa:3553%09red/hsa:409%09red/hsa:3554%09red/hsa:115727%09red/hsa:7124%09red/hsa:1844%09red/hsa:1846%09red/hsa:4616%09red/hsa:8912%09red/hsa:929%09red/hsa:7850%09red/hsa:7048%09red
Shigellosis	KEGG PATHWAY	hsa05131	3	61	0.726762	1	ENSG00000015285|ENSG00000026508|ENSG00000169429	hsa:7454|hsa:960|hsa:3576|	7454|960|3576|	http://www.genome.jp/kegg-bin/show_pathway?hsa05131/hsa:7454%09red/hsa:3576%09red/hsa:960%09red
Colorectal cancer	KEGG PATHWAY	hsa05210	3	62	0.736436	1	ENSG00000105851|ENSG00000141506|ENSG00000163513	hsa:5294|hsa:23533|hsa:7048|	5294|23533|7048|	http://www.genome.jp/kegg-bin/show_pathway?hsa05210/hsa:23533%09red/hsa:5294%09red/hsa:7048%09red
Ether lipid metabolism	KEGG PATHWAY	hsa00565	2	43	0.74497	1	ENSG00000166428|ENSG00000087253	hsa:122618|hsa:54947|	122618|54947|	http://www.genome.jp/kegg-bin/show_pathway?hsa00565/hsa:122618%09red/hsa:54947%09red
Vascular smooth muscle contraction	KEGG PATHWAY	hsa04270	6	121	0.753964	1	ENSG00000129467|ENSG00000160013|ENSG00000132329|ENSG00000166501|ENSG00000121281|ENSG00000137841	hsa:196883|hsa:5739|hsa:10267|hsa:5579|hsa:113|hsa:5330|	196883|5739|10267|5579|113|5330|	http://www.genome.jp/kegg-bin/show_pathway?hsa04270/hsa:5579%09red/hsa:10267%09red/hsa:5330%09red/hsa:113%09red/hsa:5739%09red/hsa:196883%09red
Retrograde endocannabinoid signaling	KEGG PATHWAY	hsa04723	5	103	0.759047	1	ENSG00000167083|ENSG00000129467|ENSG00000166501|ENSG00000137841|ENSG00000121281	hsa:2793|hsa:196883|hsa:5579|hsa:5330|hsa:113|	2793|196883|5579|5330|113|	http://www.genome.jp/kegg-bin/show_pathway?hsa04723/hsa:5579%09red/hsa:113%09red/hsa:5330%09red/hsa:2793%09red/hsa:196883%09red
Lysosome	KEGG PATHWAY	hsa04142	6	122	0.76056	1	ENSG00000018280|ENSG00000162511|ENSG00000163131|ENSG00000131401|ENSG00000102575|ENSG00000103811	hsa:6556|hsa:7805|hsa:1520|hsa:9476|hsa:54|hsa:1512|	6556|7805|1520|9476|54|1512|	http://www.genome.jp/kegg-bin/show_pathway?hsa04142/hsa:1512%09red/hsa:54%09red/hsa:7805%09red/hsa:1520%09red/hsa:9476%09red/hsa:6556%09red
Glioma	KEGG PATHWAY	hsa05214	3	65	0.763831	1	ENSG00000105851|ENSG00000166501|ENSG00000141506	hsa:5294|hsa:5579|hsa:23533|	5294|5579|23533|	http://www.genome.jp/kegg-bin/show_pathway?hsa05214/hsa:5579%09red/hsa:23533%09red/hsa:5294%09red
Pancreatic cancer	KEGG PATHWAY	hsa05212	3	66	0.772433	1	ENSG00000105851|ENSG00000141506|ENSG00000163513	hsa:5294|hsa:23533|hsa:7048|	5294|23533|7048|	http://www.genome.jp/kegg-bin/show_pathway?hsa05212/hsa:23533%09red/hsa:5294%09red/hsa:7048%09red
Renal cell carcinoma	KEGG PATHWAY	hsa05211	3	66	0.772433	1	ENSG00000105851|ENSG00000141506|ENSG00000129521	hsa:5294|hsa:23533|hsa:112399|	5294|23533|112399|	http://www.genome.jp/kegg-bin/show_pathway?hsa05211/hsa:23533%09red/hsa:5294%09red/hsa:112399%09red
Progesterone-mediated oocyte maturation	KEGG PATHWAY	hsa04914	4	86	0.774778	1	ENSG00000129467|ENSG00000105851|ENSG00000141506|ENSG00000121281	hsa:196883|hsa:5294|hsa:23533|hsa:113|	196883|5294|23533|113|	http://www.genome.jp/kegg-bin/show_pathway?hsa04914/hsa:113%09red/hsa:23533%09red/hsa:5294%09red/hsa:196883%09red
Calcium signaling pathway	KEGG PATHWAY	hsa04020	9	180	0.775453	1	ENSG00000129467|ENSG00000060558|ENSG00000169403|ENSG00000169252|ENSG00000166501|ENSG00000121281|ENSG00000122420|ENSG00000137841|ENSG00000196557	hsa:196883|hsa:2769|hsa:5724|hsa:154|hsa:5579|hsa:113|hsa:5737|hsa:5330|hsa:8912|	196883|2769|5724|154|5579|113|5737|5330|8912|	http://www.genome.jp/kegg-bin/show_pathway?hsa04020/hsa:5579%09red/hsa:5330%09red/hsa:5724%09red/hsa:154%09red/hsa:2769%09red/hsa:113%09red/hsa:196883%09red/hsa:8912%09red/hsa:5737%09red
Drug metabolism - other enzymes	KEGG PATHWAY	hsa00983	2	46	0.776501	1	ENSG00000025708|ENSG00000158825	hsa:1890|hsa:978|	1890|978|	http://www.genome.jp/kegg-bin/show_pathway?hsa00983/hsa:978%09red/hsa:1890%09red
ErbB signaling pathway	KEGG PATHWAY	hsa04012	4	87	0.782111	1	ENSG00000113070|ENSG00000105851|ENSG00000166501|ENSG00000141506	hsa:1839|hsa:5294|hsa:5579|hsa:23533|	1839|5294|5579|23533|	http://www.genome.jp/kegg-bin/show_pathway?hsa04012/hsa:5579%09red/hsa:23533%09red/hsa:5294%09red/hsa:1839%09red
Amino sugar and nucleotide sugar metabolism	KEGG PATHWAY	hsa00520	2	47	0.786227	1	ENSG00000135838|ENSG00000160883	hsa:80896|hsa:3101|	80896|3101|	http://www.genome.jp/kegg-bin/show_pathway?hsa00520/hsa:80896%09red/hsa:3101%09red
Glycosphingolipid biosynthesis - lacto and neolacto series	KEGG PATHWAY	hsa00601	1	26	0.801567	1	ENSG00000111846	hsa:2651|	2651|	http://www.genome.jp/kegg-bin/show_pathway?hsa00601/hsa:2651%09red
GABAergic synapse	KEGG PATHWAY	hsa04727	4	90	0.802975	1	ENSG00000167083|ENSG00000129467|ENSG00000166501|ENSG00000121281	hsa:2793|hsa:196883|hsa:5579|hsa:113|	2793|196883|5579|113|	http://www.genome.jp/kegg-bin/show_pathway?hsa04727/hsa:5579%09red/hsa:113%09red/hsa:2793%09red/hsa:196883%09red
Adipocytokine signaling pathway	KEGG PATHWAY	hsa04920	3	70	0.804301	1	ENSG00000232810|ENSG00000028137|ENSG00000184557	hsa:7124|hsa:7133|hsa:9021|	7124|7133|9021|	http://www.genome.jp/kegg-bin/show_pathway?hsa04920/hsa:7124%09red/hsa:7133%09red/hsa:9021%09red
RIG-I-like receptor signaling pathway	KEGG PATHWAY	hsa04622	3	70	0.804301	1	ENSG00000232810|ENSG00000101695|ENSG00000169429	hsa:7124|hsa:54941|hsa:3576|	7124|54941|3576|	http://www.genome.jp/kegg-bin/show_pathway?hsa04622/hsa:7124%09red/hsa:54941%09red/hsa:3576%09red
Bile secretion	KEGG PATHWAY	hsa04976	3	72	0.818775	1	ENSG00000129467|ENSG00000103569|ENSG00000121281	hsa:196883|hsa:366|hsa:113|	196883|366|113|	http://www.genome.jp/kegg-bin/show_pathway?hsa04976/hsa:113%09red/hsa:366%09red/hsa:196883%09red
Mineral absorption	KEGG PATHWAY	hsa04978	2	51	0.821491	1	ENSG00000018280|ENSG00000111424	hsa:6556|hsa:7421|	6556|7421|	http://www.genome.jp/kegg-bin/show_pathway?hsa04978/hsa:6556%09red/hsa:7421%09red
Ovarian steroidogenesis	KEGG PATHWAY	hsa04913	2	51	0.821491	1	ENSG00000129467|ENSG00000121281	hsa:196883|hsa:113|	196883|113|	http://www.genome.jp/kegg-bin/show_pathway?hsa04913/hsa:113%09red/hsa:196883%09red
Nicotinate and nicotinamide metabolism	KEGG PATHWAY	hsa00760	1	28	0.823983	1	ENSG00000166741	hsa:4837|	4837|	http://www.genome.jp/kegg-bin/show_pathway?hsa00760/hsa:4837%09red
Pentose phosphate pathway	KEGG PATHWAY	hsa00030	1	28	0.823983	1	ENSG00000007350	hsa:8277|	8277|	http://www.genome.jp/kegg-bin/show_pathway?hsa00030/hsa:8277%09red
Chronic myeloid leukemia	KEGG PATHWAY	hsa05220	3	73	0.825664	1	ENSG00000105851|ENSG00000141506|ENSG00000163513	hsa:5294|hsa:23533|hsa:7048|	5294|23533|7048|	http://www.genome.jp/kegg-bin/show_pathway?hsa05220/hsa:23533%09red/hsa:5294%09red/hsa:7048%09red
Hedgehog signaling pathway	KEGG PATHWAY	hsa04340	2	52	0.82945	1	ENSG00000125084|ENSG00000154764	hsa:7471|hsa:7476|	7471|7476|	http://www.genome.jp/kegg-bin/show_pathway?hsa04340/hsa:7476%09red/hsa:7471%09red
Endometrial cancer	KEGG PATHWAY	hsa05213	2	52	0.82945	1	ENSG00000105851|ENSG00000141506	hsa:5294|hsa:23533|	5294|23533|	http://www.genome.jp/kegg-bin/show_pathway?hsa05213/hsa:23533%09red/hsa:5294%09red
Phototransduction	KEGG PATHWAY	hsa04744	1	29	0.834223	1	ENSG00000141480	hsa:409|	409|	http://www.genome.jp/kegg-bin/show_pathway?hsa04744/hsa:409%09red
Thyroid cancer	KEGG PATHWAY	hsa05216	1	29	0.834223	1	ENSG00000198400	hsa:4914|	4914|	http://www.genome.jp/kegg-bin/show_pathway?hsa05216/hsa:4914%09red
Taste transduction	KEGG PATHWAY	hsa04742	2	53	0.837088	1	ENSG00000129467|ENSG00000137841	hsa:196883|hsa:5330|	196883|5330|	http://www.genome.jp/kegg-bin/show_pathway?hsa04742/hsa:5330%09red/hsa:196883%09red
Glutamatergic synapse	KEGG PATHWAY	hsa04724	5	116	0.838598	1	ENSG00000167083|ENSG00000129467|ENSG00000166501|ENSG00000137841|ENSG00000121281	hsa:2793|hsa:196883|hsa:5579|hsa:5330|hsa:113|	2793|196883|5579|5330|113|	http://www.genome.jp/kegg-bin/show_pathway?hsa04724/hsa:5579%09red/hsa:113%09red/hsa:5330%09red/hsa:2793%09red/hsa:196883%09red
Pancreatic secretion	KEGG PATHWAY	hsa04972	4	96	0.839825	1	ENSG00000129467|ENSG00000166501|ENSG00000137841|ENSG00000121281	hsa:196883|hsa:5579|hsa:5330|hsa:113|	196883|5579|5330|113|	http://www.genome.jp/kegg-bin/show_pathway?hsa04972/hsa:5579%09red/hsa:113%09red/hsa:5330%09red/hsa:196883%09red
Bacterial invasion of epithelial cells	KEGG PATHWAY	hsa05100	3	76	0.844999	1	ENSG00000015285|ENSG00000105851|ENSG00000141506	hsa:7454|hsa:5294|hsa:23533|	7454|5294|23533|	http://www.genome.jp/kegg-bin/show_pathway?hsa05100/hsa:7454%09red/hsa:23533%09red/hsa:5294%09red
Pathways in cancer	KEGG PATHWAY	hsa05200	16	327	0.849401	1	ENSG00000105851|ENSG00000245848|ENSG00000066336|ENSG00000169429|ENSG00000125084|ENSG00000141506|ENSG00000129521|ENSG00000198223|ENSG00000198400|ENSG00000122025|ENSG00000166501|ENSG00000119535|ENSG00000100985|ENSG00000136244|ENSG00000154764|ENSG00000163513	hsa:5294|hsa:1050|hsa:6688|hsa:3576|hsa:7471|hsa:23533|hsa:112399|hsa:1438|hsa:4914|hsa:2322|hsa:5579|hsa:1441|hsa:4318|hsa:3569|hsa:7476|hsa:7048|	5294|1050|6688|3576|7471|23533|112399|1438|4914|2322|5579|1441|4318|3569|7476|7048|	http://www.genome.jp/kegg-bin/show_pathway?hsa05200/hsa:5579%09red/hsa:3569%09red/hsa:4318%09red/hsa:23533%09red/hsa:4914%09red/hsa:7471%09red/hsa:1438%09red/hsa:7048%09red/hsa:5294%09red/hsa:112399%09red/hsa:1050%09red/hsa:3576%09red/hsa:1441%09red/hsa:6688%09red/hsa:2322%09red/hsa:7476%09red
Basal cell carcinoma	KEGG PATHWAY	hsa05217	2	55	0.851441	1	ENSG00000125084|ENSG00000154764	hsa:7471|hsa:7476|	7471|7476|	http://www.genome.jp/kegg-bin/show_pathway?hsa05217/hsa:7476%09red/hsa:7471%09red
Thyroid hormone signaling pathway	KEGG PATHWAY	hsa04919	5	119	0.85353	1	ENSG00000148400|ENSG00000105851|ENSG00000166501|ENSG00000137841|ENSG00000141506	hsa:4851|hsa:5294|hsa:5579|hsa:5330|hsa:23533|	4851|5294|5579|5330|23533|	http://www.genome.jp/kegg-bin/show_pathway?hsa04919/hsa:5579%09red/hsa:4851%09red/hsa:23533%09red/hsa:5294%09red/hsa:5330%09red
Oxytocin signaling pathway	KEGG PATHWAY	hsa04921	7	159	0.854621	1	ENSG00000129467|ENSG00000105851|ENSG00000141506|ENSG00000101096|ENSG00000166501|ENSG00000121281|ENSG00000137841	hsa:196883|hsa:5294|hsa:23533|hsa:4773|hsa:5579|hsa:113|hsa:5330|	196883|5294|23533|4773|5579|113|5330|	http://www.genome.jp/kegg-bin/show_pathway?hsa04921/hsa:5579%09red/hsa:23533%09red/hsa:5330%09red/hsa:5294%09red/hsa:4773%09red/hsa:113%09red/hsa:196883%09red
Wnt signaling pathway	KEGG PATHWAY	hsa04310	6	140	0.857778	1	ENSG00000107984|ENSG00000125084|ENSG00000101096|ENSG00000166501|ENSG00000154764|ENSG00000137841	hsa:22943|hsa:7471|hsa:4773|hsa:5579|hsa:7476|hsa:5330|	22943|7471|4773|5579|7476|5330|	http://www.genome.jp/kegg-bin/show_pathway?hsa04310/hsa:5579%09red/hsa:7476%09red/hsa:22943%09red/hsa:7471%09red/hsa:5330%09red/hsa:4773%09red
Starch and sucrose metabolism	KEGG PATHWAY	hsa00500	2	56	0.858177	1	ENSG00000160883|ENSG00000257335	hsa:3101|hsa:8972|	3101|8972|	http://www.genome.jp/kegg-bin/show_pathway?hsa00500/hsa:8972%09red/hsa:3101%09red
Neurotrophin signaling pathway	KEGG PATHWAY	hsa04722	5	120	0.858245	1	ENSG00000111348|ENSG00000198400|ENSG00000007264|ENSG00000105851|ENSG00000141506	hsa:397|hsa:4914|hsa:4145|hsa:5294|hsa:23533|	397|4914|4145|5294|23533|	http://www.genome.jp/kegg-bin/show_pathway?hsa04722/hsa:4914%09red/hsa:397%09red/hsa:23533%09red/hsa:5294%09red/hsa:4145%09red
Fructose and mannose metabolism	KEGG PATHWAY	hsa00051	1	32	0.861508	1	ENSG00000160883	hsa:3101|	3101|	http://www.genome.jp/kegg-bin/show_pathway?hsa00051/hsa:3101%09red
SNARE interactions in vesicular transport	KEGG PATHWAY	hsa04130	1	34	0.877156	1	ENSG00000118640	hsa:8673|	8673|	http://www.genome.jp/kegg-bin/show_pathway?hsa04130/hsa:8673%09red
Long-term depression	KEGG PATHWAY	hsa04730	2	60	0.882412	1	ENSG00000166501|ENSG00000137841	hsa:5579|hsa:5330|	5579|5330|	http://www.genome.jp/kegg-bin/show_pathway?hsa04730/hsa:5579%09red/hsa:5330%09red
Alanine, aspartate and glutamate metabolism	KEGG PATHWAY	hsa00250	1	35	0.884305	1	ENSG00000104951	hsa:259307|	259307|	http://www.genome.jp/kegg-bin/show_pathway?hsa00250/hsa:259307%09red
Axon guidance	KEGG PATHWAY	hsa04360	5	127	0.887804	1	ENSG00000121966|ENSG00000198910|ENSG00000154928|ENSG00000101096|ENSG00000196189	hsa:7852|hsa:3897|hsa:2047|hsa:4773|hsa:64218|	7852|3897|2047|4773|64218|	http://www.genome.jp/kegg-bin/show_pathway?hsa04360/hsa:64218%09red/hsa:3897%09red/hsa:4773%09red/hsa:7852%09red/hsa:2047%09red
Adrenergic signaling in cardiomyocytes	KEGG PATHWAY	hsa04261	6	149	0.892622	1	ENSG00000129467|ENSG00000105851|ENSG00000141506|ENSG00000169252|ENSG00000121281|ENSG00000137841	hsa:196883|hsa:5294|hsa:23533|hsa:154|hsa:113|hsa:5330|	196883|5294|23533|154|113|5330|	http://www.genome.jp/kegg-bin/show_pathway?hsa04261/hsa:23533%09red/hsa:5330%09red/hsa:154%09red/hsa:5294%09red/hsa:113%09red/hsa:196883%09red
Arachidonic acid metabolism	KEGG PATHWAY	hsa00590	2	62	0.893037	1	ENSG00000095303|ENSG00000059377	hsa:5742|hsa:6916|	5742|6916|	http://www.genome.jp/kegg-bin/show_pathway?hsa00590/hsa:6916%09red/hsa:5742%09red
Retinol metabolism	KEGG PATHWAY	hsa00830	2	64	0.902764	1	ENSG00000162496|ENSG00000167600	hsa:9249|hsa:29785|	9249|29785|	http://www.genome.jp/kegg-bin/show_pathway?hsa00830/hsa:9249%09red/hsa:29785%09red
Cysteine and methionine metabolism	KEGG PATHWAY	hsa00270	1	38	0.903351	1	ENSG00000104951	hsa:259307|	259307|	http://www.genome.jp/kegg-bin/show_pathway?hsa00270/hsa:259307%09red
Regulation of actin cytoskeleton	KEGG PATHWAY	hsa04810	9	215	0.908698	1	ENSG00000105851|ENSG00000169896|ENSG00000160255|ENSG00000140678|ENSG00000015285|ENSG00000141506|ENSG00000123338|ENSG00000141968|ENSG00000170458	hsa:5294|hsa:3684|hsa:3689|hsa:3687|hsa:7454|hsa:23533|hsa:3071|hsa:7409|hsa:929|	5294|3684|3689|3687|7454|23533|3071|7409|929|	http://www.genome.jp/kegg-bin/show_pathway?hsa04810/hsa:3689%09red/hsa:23533%09red/hsa:7454%09red/hsa:5294%09red/hsa:3684%09red/hsa:3687%09red/hsa:7409%09red/hsa:929%09red/hsa:3071%09red
Hepatitis C	KEGG PATHWAY	hsa05160	5	133	0.908765	1	ENSG00000184557|ENSG00000232810|ENSG00000105851|ENSG00000141506|ENSG00000169429	hsa:9021|hsa:7124|hsa:5294|hsa:23533|hsa:3576|	9021|7124|5294|23533|3576|	http://www.genome.jp/kegg-bin/show_pathway?hsa05160/hsa:7124%09red/hsa:23533%09red/hsa:5294%09red/hsa:3576%09red/hsa:9021%09red
Glycolysis / Gluconeogenesis	KEGG PATHWAY	hsa00010	2	66	0.91166	1	ENSG00000160883|ENSG00000260898	hsa:3101|hsa:83440|	3101|83440|	http://www.genome.jp/kegg-bin/show_pathway?hsa00010/hsa:83440%09red/hsa:3101%09red
Dilated cardiomyopathy	KEGG PATHWAY	hsa05414	3	90	0.912475	1	ENSG00000129467|ENSG00000232810|ENSG00000121281	hsa:196883|hsa:7124|hsa:113|	196883|7124|113|	http://www.genome.jp/kegg-bin/show_pathway?hsa05414/hsa:113%09red/hsa:7124%09red/hsa:196883%09red
Long-term potentiation	KEGG PATHWAY	hsa04720	2	67	0.915816	1	ENSG00000166501|ENSG00000137841	hsa:5579|hsa:5330|	5579|5330|	http://www.genome.jp/kegg-bin/show_pathway?hsa04720/hsa:5579%09red/hsa:5330%09red
Serotonergic synapse	KEGG PATHWAY	hsa04726	4	114	0.917353	1	ENSG00000095303|ENSG00000166501|ENSG00000137841|ENSG00000167083	hsa:5742|hsa:5579|hsa:5330|hsa:2793|	5742|5579|5330|2793|	http://www.genome.jp/kegg-bin/show_pathway?hsa04726/hsa:5579%09red/hsa:5742%09red/hsa:2793%09red/hsa:5330%09red
Amphetamine addiction	KEGG PATHWAY	hsa05031	2	68	0.919788	1	ENSG00000166501|ENSG00000198576	hsa:5579|hsa:23237|	5579|23237|	http://www.genome.jp/kegg-bin/show_pathway?hsa05031/hsa:5579%09red/hsa:23237%09red
Epithelial cell signaling in Helicobacter pylori infection	KEGG PATHWAY	hsa05120	2	68	0.919788	1	ENSG00000113070|ENSG00000169429	hsa:1839|hsa:3576|	1839|3576|	http://www.genome.jp/kegg-bin/show_pathway?hsa05120/hsa:1839%09red/hsa:3576%09red
cAMP signaling pathway	KEGG PATHWAY	hsa04024	8	200	0.921366	1	ENSG00000129467|ENSG00000255398|ENSG00000105851|ENSG00000141506|ENSG00000169252|ENSG00000182782|ENSG00000121281|ENSG00000141968	hsa:196883|hsa:8843|hsa:5294|hsa:23533|hsa:154|hsa:338442|hsa:113|hsa:7409|	196883|8843|5294|23533|154|338442|113|7409|	http://www.genome.jp/kegg-bin/show_pathway?hsa04024/hsa:23533%09red/hsa:154%09red/hsa:5294%09red/hsa:113%09red/hsa:8843%09red/hsa:7409%09red/hsa:196883%09red/hsa:338442%09red
Melanoma	KEGG PATHWAY	hsa05218	2	71	0.93067	1	ENSG00000105851|ENSG00000141506	hsa:5294|hsa:23533|	5294|23533|	http://www.genome.jp/kegg-bin/show_pathway?hsa05218/hsa:23533%09red/hsa:5294%09red
ABC transporters	KEGG PATHWAY	hsa02010	1	44	0.932558	1	ENSG00000069431	hsa:10060|	10060|	http://www.genome.jp/kegg-bin/show_pathway?hsa02010/hsa:10060%09red
Valine, leucine and isoleucine degradation	KEGG PATHWAY	hsa00280	1	44	0.932558	1	ENSG00000104951	hsa:259307|	259307|	http://www.genome.jp/kegg-bin/show_pathway?hsa00280/hsa:259307%09red
Proteasome	KEGG PATHWAY	hsa03050	1	44	0.932558	1	ENSG00000154611	hsa:143471|	143471|	http://www.genome.jp/kegg-bin/show_pathway?hsa03050/hsa:143471%09red
Vasopressin-regulated water reabsorption	KEGG PATHWAY	hsa04962	1	45	0.936484	1	ENSG00000111348	hsa:397|	397|	http://www.genome.jp/kegg-bin/show_pathway?hsa04962/hsa:397%09red
Adherens junction	KEGG PATHWAY	hsa04520	2	73	0.937132	1	ENSG00000015285|ENSG00000163513	hsa:7454|hsa:7048|	7454|7048|	http://www.genome.jp/kegg-bin/show_pathway?hsa04520/hsa:7454%09red/hsa:7048%09red
Endocytosis	KEGG PATHWAY	hsa04144	8	213	0.947254	1	ENSG00000121966|ENSG00000100055|ENSG00000198400|ENSG00000169252|ENSG00000160791|ENSG00000165457|ENSG00000141480|ENSG00000163513	hsa:7852|hsa:27128|hsa:4914|hsa:154|hsa:1234|hsa:2350|hsa:409|hsa:7048|	7852|27128|4914|154|1234|2350|409|7048|	http://www.genome.jp/kegg-bin/show_pathway?hsa04144/hsa:4914%09red/hsa:409%09red/hsa:1234%09red/hsa:154%09red/hsa:2350%09red/hsa:7048%09red/hsa:7852%09red/hsa:27128%09red
Pyrimidine metabolism	KEGG PATHWAY	hsa00240	3	105	0.95418	1	ENSG00000025708|ENSG00000138185|ENSG00000158825	hsa:1890|hsa:953|hsa:978|	1890|953|978|	http://www.genome.jp/kegg-bin/show_pathway?hsa00240/hsa:978%09red/hsa:1890%09red/hsa:953%09red
TGF-beta signaling pathway	KEGG PATHWAY	hsa04350	2	80	0.955528	1	ENSG00000232810|ENSG00000163513	hsa:7124|hsa:7048|	7124|7048|	http://www.genome.jp/kegg-bin/show_pathway?hsa04350/hsa:7124%09red/hsa:7048%09red
Carbon metabolism	KEGG PATHWAY	hsa01200	3	106	0.956162	1	ENSG00000160883|ENSG00000260898|ENSG00000007350	hsa:3101|hsa:83440|hsa:8277|	3101|83440|8277|	http://www.genome.jp/kegg-bin/show_pathway?hsa01200/hsa:83440%09red/hsa:8277%09red/hsa:3101%09red
Purine metabolism	KEGG PATHWAY	hsa00230	6	176	0.956886	1	ENSG00000129467|ENSG00000196839|ENSG00000138185|ENSG00000186642|ENSG00000121281|ENSG00000256633	hsa:196883|hsa:100|hsa:953|hsa:5138|hsa:113|hsa:5138|	196883|100|953|5138|113|5138|	http://www.genome.jp/kegg-bin/show_pathway?hsa00230/hsa:100%09red/hsa:5138%09red/hsa:113%09red/hsa:953%09red/hsa:196883%09red
Hippo signaling pathway	KEGG PATHWAY	hsa04390	5	154	0.957535	1	ENSG00000118523|ENSG00000160255|ENSG00000125084|ENSG00000154764|ENSG00000163513	hsa:1490|hsa:3689|hsa:7471|hsa:7476|hsa:7048|	1490|3689|7471|7476|7048|	http://www.genome.jp/kegg-bin/show_pathway?hsa04390/hsa:7476%09red/hsa:3689%09red/hsa:7048%09red/hsa:1490%09red/hsa:7471%09red
Dopaminergic synapse	KEGG PATHWAY	hsa04728	4	131	0.957766	1	ENSG00000141480|ENSG00000166501|ENSG00000137841|ENSG00000167083	hsa:409|hsa:5579|hsa:5330|hsa:2793|	409|5579|5330|2793|	http://www.genome.jp/kegg-bin/show_pathway?hsa04728/hsa:5579%09red/hsa:2793%09red/hsa:409%09red/hsa:5330%09red
PI3K-Akt signaling pathway	KEGG PATHWAY	hsa04151	14	347	0.961622	1	ENSG00000184574|ENSG00000198121|ENSG00000105851|ENSG00000250771|ENSG00000165025|ENSG00000160712|ENSG00000155629|ENSG00000137462|ENSG00000141506|ENSG00000167083|ENSG00000119535|ENSG00000099985|ENSG00000136244|ENSG00000118513	hsa:57121|hsa:1902|hsa:5294|hsa:7097|hsa:6850|hsa:3570|hsa:118788|hsa:7097|hsa:23533|hsa:2793|hsa:1441|hsa:5008|hsa:3569|hsa:4602|	57121|1902|5294|7097|6850|3570|118788|7097|23533|2793|1441|5008|3569|4602|	http://www.genome.jp/kegg-bin/show_pathway?hsa04151/hsa:3569%09red/hsa:3570%09red/hsa:118788%09red/hsa:57121%09red/hsa:7097%09red/hsa:5294%09red/hsa:1902%09red/hsa:6850%09red/hsa:4602%09red/hsa:23533%09red/hsa:1441%09red/hsa:5008%09red/hsa:2793%09red
Hypertrophic cardiomyopathy (HCM)	KEGG PATHWAY	hsa05410	2	83	0.961722	1	ENSG00000136244|ENSG00000232810	hsa:3569|hsa:7124|	3569|7124|	http://www.genome.jp/kegg-bin/show_pathway?hsa05410/hsa:7124%09red/hsa:3569%09red
Vibrio cholerae infection	KEGG PATHWAY	hsa05110	1	54	0.962983	1	ENSG00000166501	hsa:5579|	5579|	http://www.genome.jp/kegg-bin/show_pathway?hsa05110/hsa:5579%09red
Small cell lung cancer	KEGG PATHWAY	hsa05222	2	86	0.967084	1	ENSG00000105851|ENSG00000141506	hsa:5294|hsa:23533|	5294|23533|	http://www.genome.jp/kegg-bin/show_pathway?hsa05222/hsa:23533%09red/hsa:5294%09red
ECM-receptor interaction	KEGG PATHWAY	hsa04512	2	87	0.968705	1	ENSG00000169704|ENSG00000026508	hsa:2815|hsa:960|	2815|960|	http://www.genome.jp/kegg-bin/show_pathway?hsa04512/hsa:2815%09red/hsa:960%09red
Prostate cancer	KEGG PATHWAY	hsa05215	2	89	0.971718	1	ENSG00000105851|ENSG00000141506	hsa:5294|hsa:23533|	5294|23533|	http://www.genome.jp/kegg-bin/show_pathway?hsa05215/hsa:23533%09red/hsa:5294%09red
Insulin signaling pathway	KEGG PATHWAY	hsa04910	4	141	0.972035	1	ENSG00000160883|ENSG00000184557|ENSG00000105851|ENSG00000141506	hsa:3101|hsa:9021|hsa:5294|hsa:23533|	3101|9021|5294|23533|	http://www.genome.jp/kegg-bin/show_pathway?hsa04910/hsa:23533%09red/hsa:5294%09red/hsa:9021%09red/hsa:3101%09red
Signaling pathways regulating pluripotency of stem cells	KEGG PATHWAY	hsa04550	4	142	0.973182	1	ENSG00000125084|ENSG00000105851|ENSG00000154764|ENSG00000141506	hsa:7471|hsa:5294|hsa:7476|hsa:23533|	7471|5294|7476|23533|	http://www.genome.jp/kegg-bin/show_pathway?hsa04550/hsa:7476%09red/hsa:23533%09red/hsa:5294%09red/hsa:7471%09red
Glycerophospholipid metabolism	KEGG PATHWAY	hsa00564	2	92	0.97572	1	ENSG00000166428|ENSG00000087253	hsa:122618|hsa:54947|	122618|54947|	http://www.genome.jp/kegg-bin/show_pathway?hsa00564/hsa:122618%09red/hsa:54947%09red
p53 signaling pathway	KEGG PATHWAY	hsa04115	1	68	0.984023	1	ENSG00000099860	hsa:4616|	4616|	http://www.genome.jp/kegg-bin/show_pathway?hsa04115/hsa:4616%09red
PPAR signaling pathway	KEGG PATHWAY	hsa03320	1	69	0.984954	1	ENSG00000259630	hsa:2171|	2171|	http://www.genome.jp/kegg-bin/show_pathway?hsa03320/hsa:2171%09red
Biosynthesis of amino acids	KEGG PATHWAY	hsa01230	1	74	0.988856	1	ENSG00000007350	hsa:8277|	8277|	http://www.genome.jp/kegg-bin/show_pathway?hsa01230/hsa:8277%09red
Metabolism of xenobiotics by cytochrome P450	KEGG PATHWAY	hsa00980	1	74	0.988856	1	ENSG00000167600	hsa:29785|	29785|	http://www.genome.jp/kegg-bin/show_pathway?hsa00980/hsa:29785%09red
Oocyte meiosis	KEGG PATHWAY	hsa04114	2	110	0.990421	1	ENSG00000129467|ENSG00000121281	hsa:196883|hsa:113|	196883|113|	http://www.genome.jp/kegg-bin/show_pathway?hsa04114/hsa:113%09red/hsa:196883%09red
Ribosome biogenesis in eukaryotes	KEGG PATHWAY	hsa03008	1	84	0.993888	1	ENSG00000260078	hsa:643802|	643802|	http://www.genome.jp/kegg-bin/show_pathway?hsa03008/hsa:643802%09red
Ras signaling pathway	KEGG PATHWAY	hsa04014	6	228	0.994083	1	ENSG00000171777|ENSG00000105851|ENSG00000141506|ENSG00000157557|ENSG00000167083|ENSG00000166501	hsa:115727|hsa:5294|hsa:23533|hsa:2114|hsa:2793|hsa:5579|	115727|5294|23533|2114|2793|5579|	http://www.genome.jp/kegg-bin/show_pathway?hsa04014/hsa:5579%09red/hsa:23533%09red/hsa:2114%09red/hsa:115727%09red/hsa:2793%09red/hsa:5294%09red
Viral carcinogenesis	KEGG PATHWAY	hsa05203	5	206	0.994832	1	ENSG00000165025|ENSG00000105851|ENSG00000141506|ENSG00000160791|ENSG00000122877	hsa:6850|hsa:5294|hsa:23533|hsa:1234|hsa:1959|	6850|5294|23533|1234|1959|	http://www.genome.jp/kegg-bin/show_pathway?hsa05203/hsa:1959%09red/hsa:23533%09red/hsa:5294%09red/hsa:1234%09red/hsa:6850%09red
Focal adhesion	KEGG PATHWAY	hsa04510	5	207	0.995049	1	ENSG00000141506|ENSG00000138964|ENSG00000105851|ENSG00000166501|ENSG00000141968	hsa:23533|hsa:64098|hsa:5294|hsa:5579|hsa:7409|	23533|64098|5294|5579|7409|	http://www.genome.jp/kegg-bin/show_pathway?hsa04510/hsa:5579%09red/hsa:23533%09red/hsa:5294%09red/hsa:7409%09red/hsa:64098%09red
AMPK signaling pathway	KEGG PATHWAY	hsa04152	2	124	0.995421	1	ENSG00000105851|ENSG00000141506	hsa:5294|hsa:23533|	5294|23533|	http://www.genome.jp/kegg-bin/show_pathway?hsa04152/hsa:23533%09red/hsa:5294%09red
Protein digestion and absorption	KEGG PATHWAY	hsa04974	1	89	0.995474	1	ENSG00000104783	hsa:3783|	3783|	http://www.genome.jp/kegg-bin/show_pathway?hsa04974/hsa:3783%09red
Tight junction	KEGG PATHWAY	hsa04530	2	134	0.997314	1	ENSG00000166501|ENSG00000082397	hsa:5579|hsa:23136|	5579|23136|	http://www.genome.jp/kegg-bin/show_pathway?hsa04530/hsa:5579%09red/hsa:23136%09red
Alzheimer's disease	KEGG PATHWAY	hsa05010	3	168	0.99766	1	ENSG00000125538|ENSG00000232810|ENSG00000137841	hsa:3553|hsa:7124|hsa:5330|	3553|7124|5330|	http://www.genome.jp/kegg-bin/show_pathway?hsa05010/hsa:7124%09red/hsa:3553%09red/hsa:5330%09red
Cell cycle	KEGG PATHWAY	hsa04110	1	124	0.999448	1	ENSG00000099860	hsa:4616|	4616|	http://www.genome.jp/kegg-bin/show_pathway?hsa04110/hsa:4616%09red
MicroRNAs in cancer	KEGG PATHWAY	hsa05206	6	297	0.999692	1	ENSG00000026508|ENSG00000122861|ENSG00000149418|ENSG00000100985|ENSG00000148400|ENSG00000166501	hsa:960|hsa:5328|hsa:6768|hsa:4318|hsa:4851|hsa:5579|	960|5328|6768|4318|4851|5579|	http://www.genome.jp/kegg-bin/show_pathway?hsa05206/hsa:5579%09red/hsa:4318%09red/hsa:5328%09red/hsa:960%09red/hsa:6768%09red/hsa:4851%09red
Ubiquitin mediated proteolysis	KEGG PATHWAY	hsa04120	1	137	0.999748	1	ENSG00000184557	hsa:9021|	9021|	http://www.genome.jp/kegg-bin/show_pathway?hsa04120/hsa:9021%09red
Alcoholism	KEGG PATHWAY	hsa05034	1	180	0.999981	1	ENSG00000167083	hsa:2793|	2793|	http://www.genome.jp/kegg-bin/show_pathway?hsa05034/hsa:2793%09red
Huntington's disease	KEGG PATHWAY	hsa05016	1	183	0.999984	1	ENSG00000137841	hsa:5330|	5330|	http://www.genome.jp/kegg-bin/show_pathway?hsa05016/hsa:5330%09red
Olfactory transduction	KEGG PATHWAY	hsa04740	1	405	1	1	ENSG00000141480	hsa:409|	409|	http://www.genome.jp/kegg-bin/show_pathway?hsa04740/hsa:409%09red
Metabolic pathways	KEGG PATHWAY	hsa01100	20	1213	1	1	ENSG00000160883|ENSG00000196839|ENSG00000257335|ENSG00000162496|ENSG00000141744|ENSG00000166428|ENSG00000115919|ENSG00000059377|ENSG00000007350|ENSG00000158825|ENSG00000025708|ENSG00000167600|ENSG00000095303|ENSG00000137841|ENSG00000260898|ENSG00000166741|ENSG00000087253|ENSG00000111846|ENSG00000104951|ENSG00000109452	hsa:3101|hsa:100|hsa:8972|hsa:9249|hsa:5409|hsa:122618|hsa:8942|hsa:6916|hsa:8277|hsa:978|hsa:1890|hsa:29785|hsa:5742|hsa:5330|hsa:83440|hsa:4837|hsa:54947|hsa:2651|hsa:259307|hsa:8821|	3101|100|8972|9249|5409|122618|8942|6916|8277|978|1890|29785|5742|5330|83440|4837|54947|2651|259307|8821|	http://www.genome.jp/kegg-bin/show_pathway?hsa01100/hsa:2651%09red/hsa:9249%09red/hsa:29785%09red/hsa:122618%09red/hsa:5330%09red/hsa:259307%09red/hsa:5409%09red/hsa:8277%09red/hsa:4837%09red/hsa:8821%09red/hsa:100%09red/hsa:8972%09red/hsa:8942%09red/hsa:978%09red/hsa:6916%09red/hsa:83440%09red/hsa:3101%09red/hsa:54947%09red/hsa:1890%09red/hsa:5742%09red
--------------------
#Term	Database	ID	Input number	Background number	P-Value	Corrected P-Value	Input	KEGG_ID/KO	Entrez_ID	Hyperlink
--------------------
#Term	Database	ID	Input number	Background number	P-Value	Corrected P-Value	Input	KEGG_ID/KO	Entrez_ID	Hyperlink
--------------------
